# Supplementary material for: Enhancing the Photophysical Properties of NHC-Based Iron Sensitizers for Dye-Sensitized Solar Cells: A Computational Study
Source: MDPI journal article supplement (doi:10.3390/inorganics14020064), 2026-02-20
Supplement: s1 [file inorganics-4074651-supplementary.pdf › inorganics-4074651-supplementary.pdf]

# Supplementary Material for:

## Enhancing the Photophysical Properties of NHC-Based Iron Sensitizers for Dye-Sensitized Solar Cells: A Computational Study

Wissam Helal,<sup>1,\*</sup> Ayat M. Siedat,<sup>1,2,\*</sup> Ahmad Musleh Alrub,<sup>3</sup> Saleh Atiewi,<sup>4,5</sup>  
Ahmad S. Barham,<sup>1</sup> Mohammad I. Alkhatab,<sup>6</sup> Basma Elzein<sup>7,8</sup>

<sup>1</sup> *Department of Chemistry, The University of Jordan, Amman 11942, Jordan.*

<sup>2</sup> *Department of Chemistry, Al-Hussein Bin Talal University, Ma'an 71111, Jordan.*

<sup>3</sup> *Department of Physics, Al-Hussein Bin Talal University, Ma'an 71111, Jordan.*

<sup>4</sup> *Faculty of Information Technology, Al-Hussein Bin Talal University, Ma'an, Jordan 71110.*

<sup>5</sup> *Faculty of Information Technology, Aqaba University of Technology, Aqaba, Jordan 77110.*

<sup>6</sup> *ADNOC Technical Academy, Near Schlumberger - Al Shamkhah P.O.Box 898/13-  
Abu Dhabi, United Arab Emirates.*

<sup>7</sup> *Electrical Engineering Department, College of Engineerin, University of  
Business and Technology, Jeddah, 21451, Saudi Arabia.*

<sup>8</sup> *Sustainable Development Department, Global Council for Tolerance and Peace, 1605 Valetta,  
Malta*

\* Corresponding author.

E-mail: [wissam.helal@ju.edu.jo](mailto:wissam.helal@ju.edu.jo) (W.H.); [ayat.saidat88@gmail.com](mailto:ayat.saidat88@gmail.com) (A.M.S.)

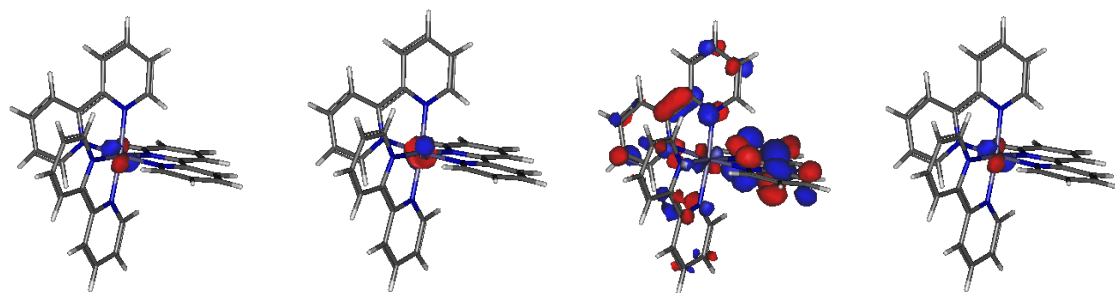

**A1: HOMO-1**

**A1: HOMO**

**A1: LUMO**

**A1: LUMO+1**

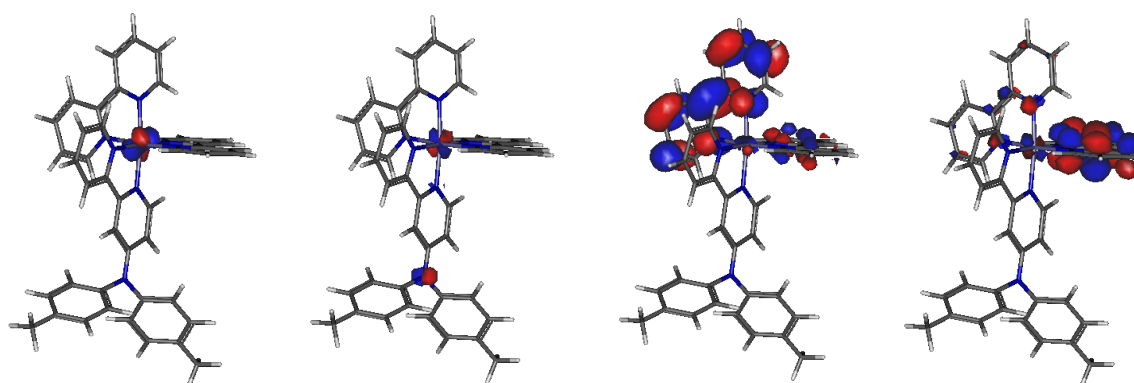

**A2: HOMO-1**

**A2: HOMO**

**A2: LUMO**

**A2: LUMO+1**

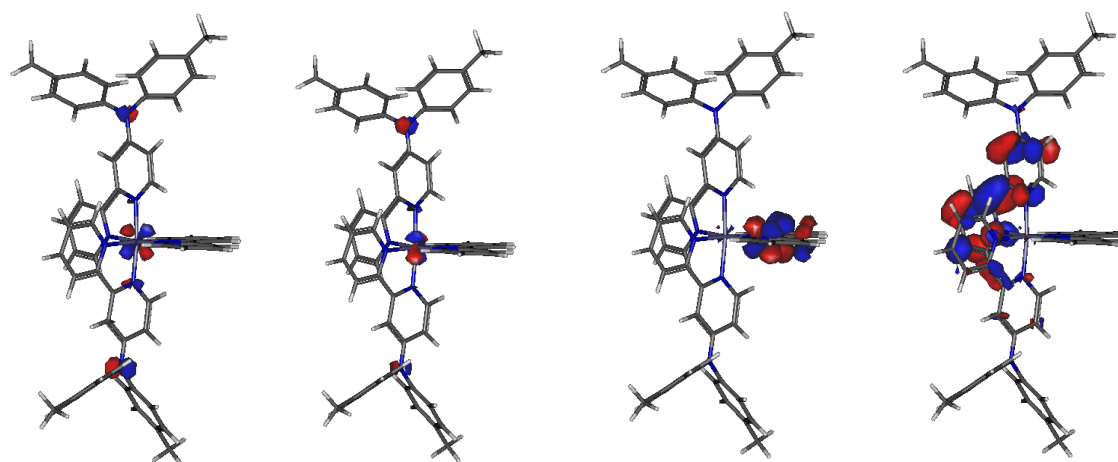

**A3: HOMO-1**

**A3: HOMO**

**A3: LUMO**

**A3: LUMO+1**

Figure S1: Frontier MOs (HOMO-1, HOMO, LUMO and LUMO+1) involved in the main transitions of iron dyes **A1** – **A3**. Isosurface value 0.02.

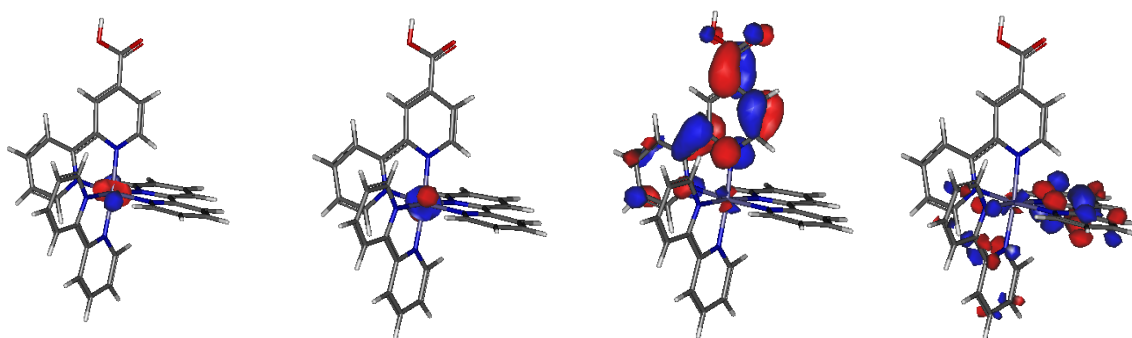

A4: HOMO-1

A4: HOMO

A4: LUMO

A4: LUMO+1

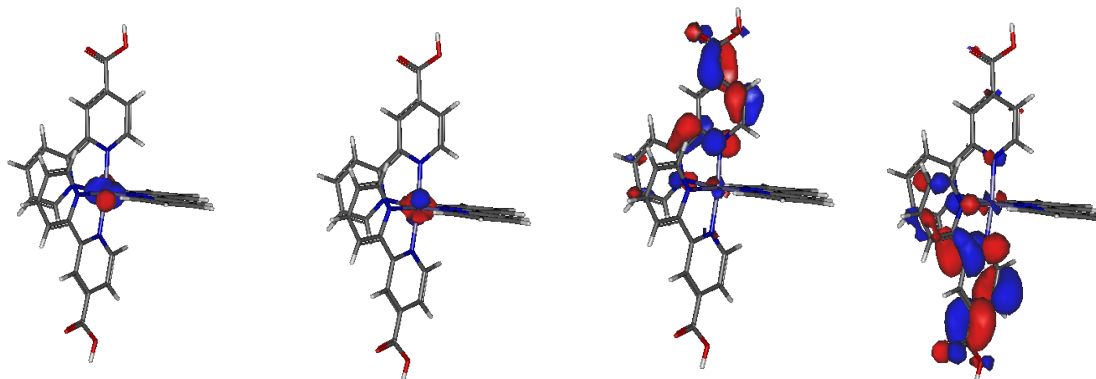

A5: HOMO-1

A5: HOMO

A5: LUMO

A5: LUMO+1

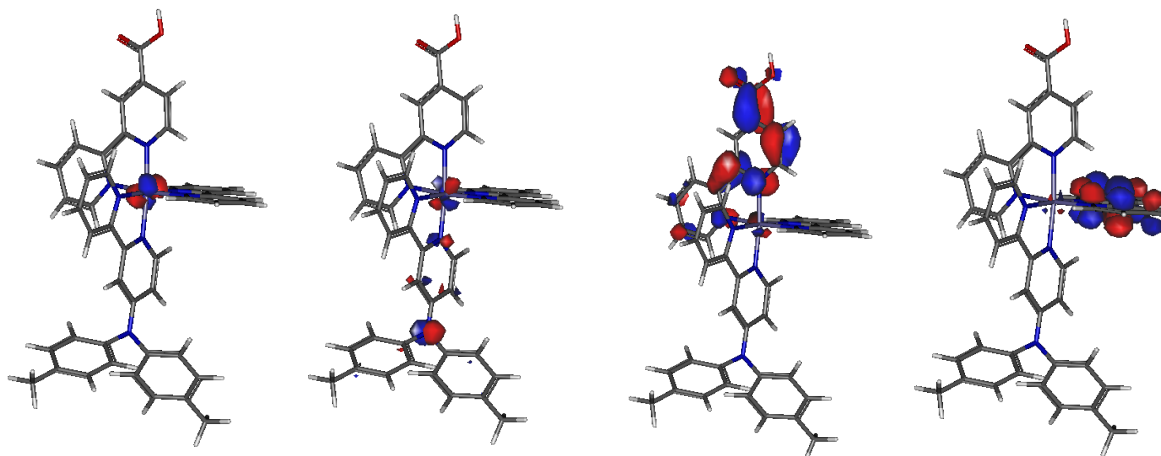

A6: HOMO-1

A6: HOMO

A6: LUMO

A6: LUMO+1

Figure S2: Frontier MOs (HOMO-1, HOMO, LUMO and LUMO+1) involved in the main transitions of iron dyes **A4** – **A6**. Isosurface value 0.02.

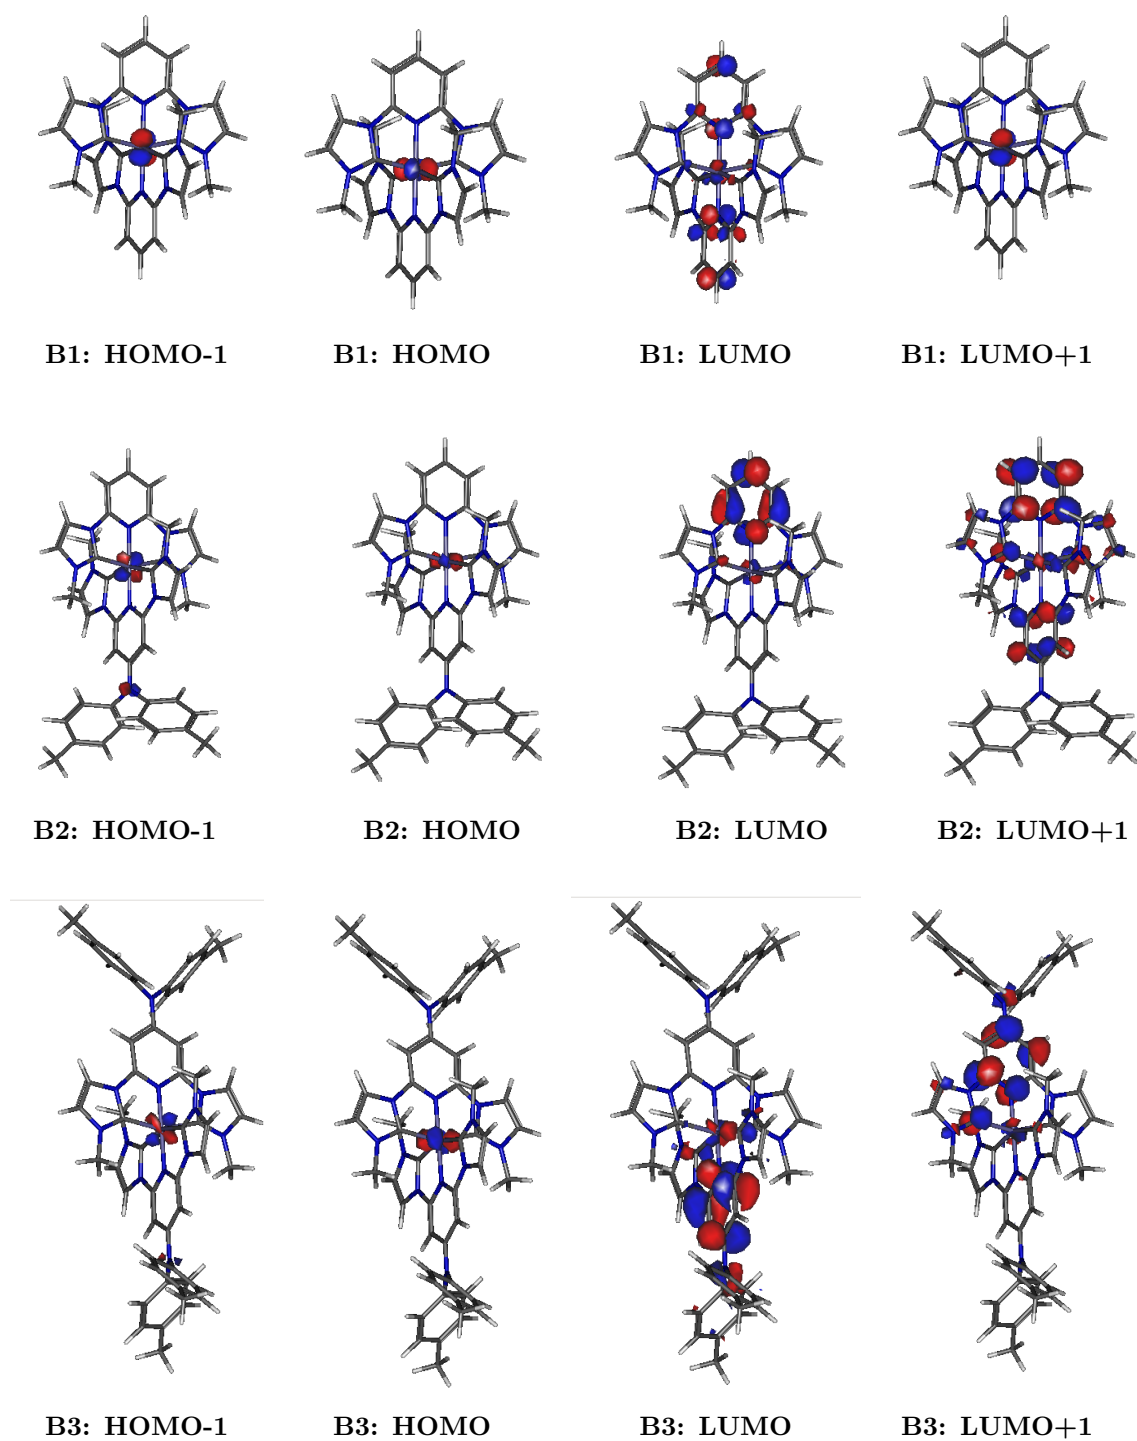

Figure S3: Frontier MOs (HOMO-1, HOMO, LUMO and LUMO+1) involved in the main transitions of iron dyes **B1** – **B3**. Isosurface value 0.02.



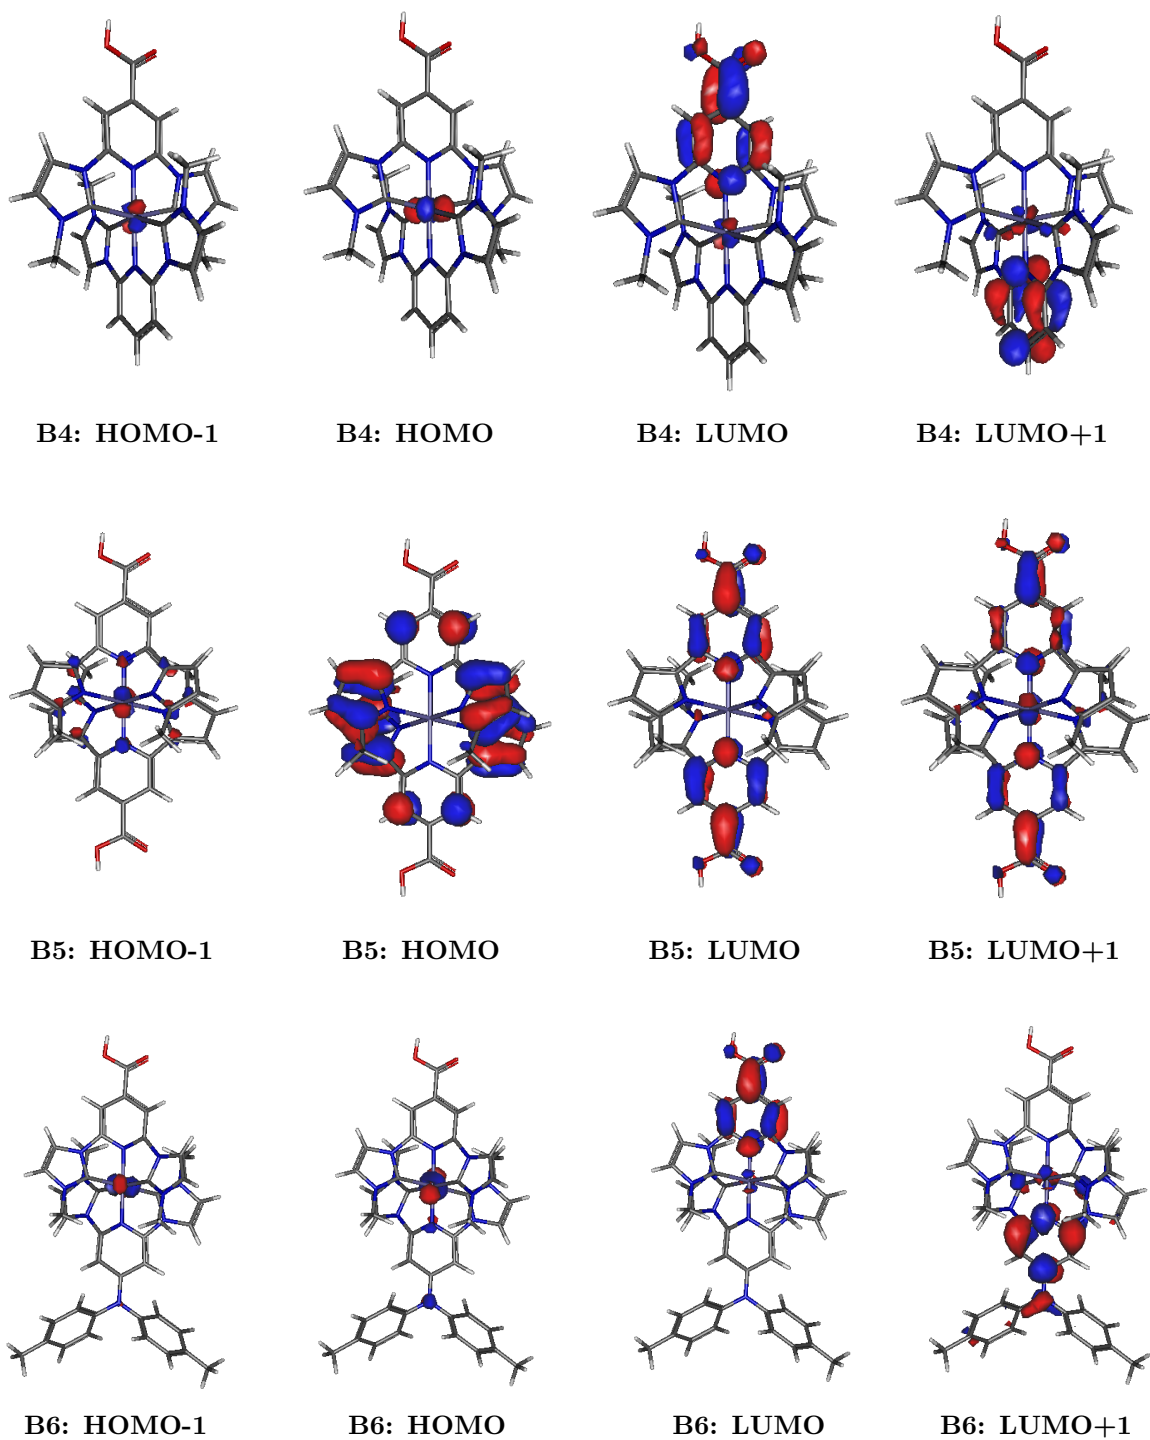

Figure S4: Frontier MOs (HOMO-1, HOMO, LUMO and LUMO+1) involved in the main transitions of iron dyes **B4** – **B6**. Isosurface value 0.02.

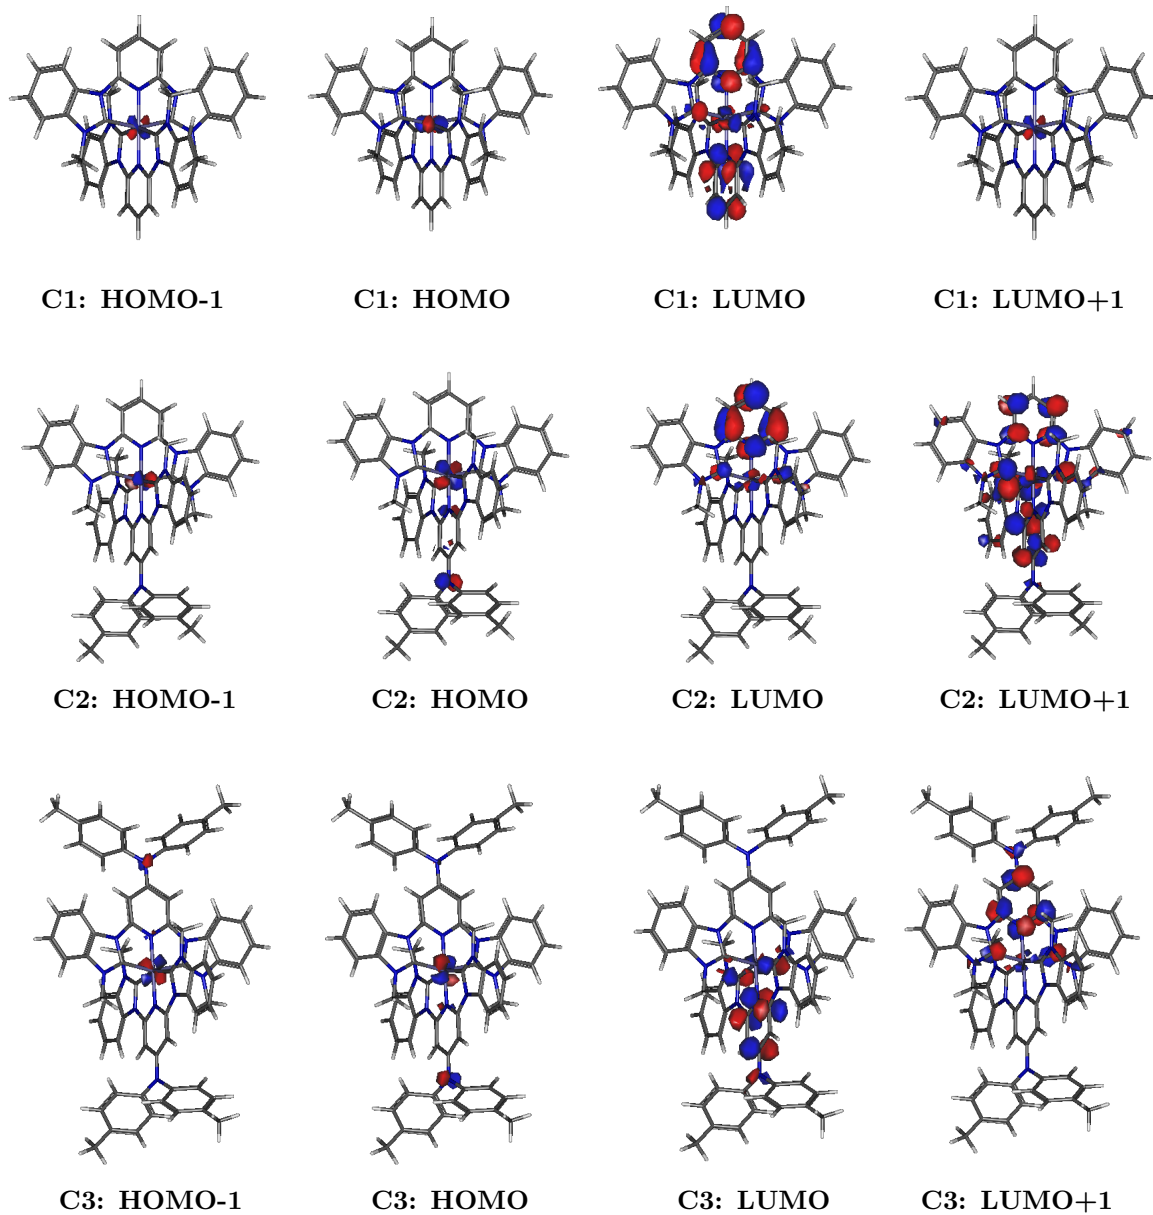

Figure S5: Frontier MOs (HOMO-1, HOMO, LUMO and LUMO+1) involved in the main transitions of iron dyes **C1** – **C3**. Isosurface value 0.02.

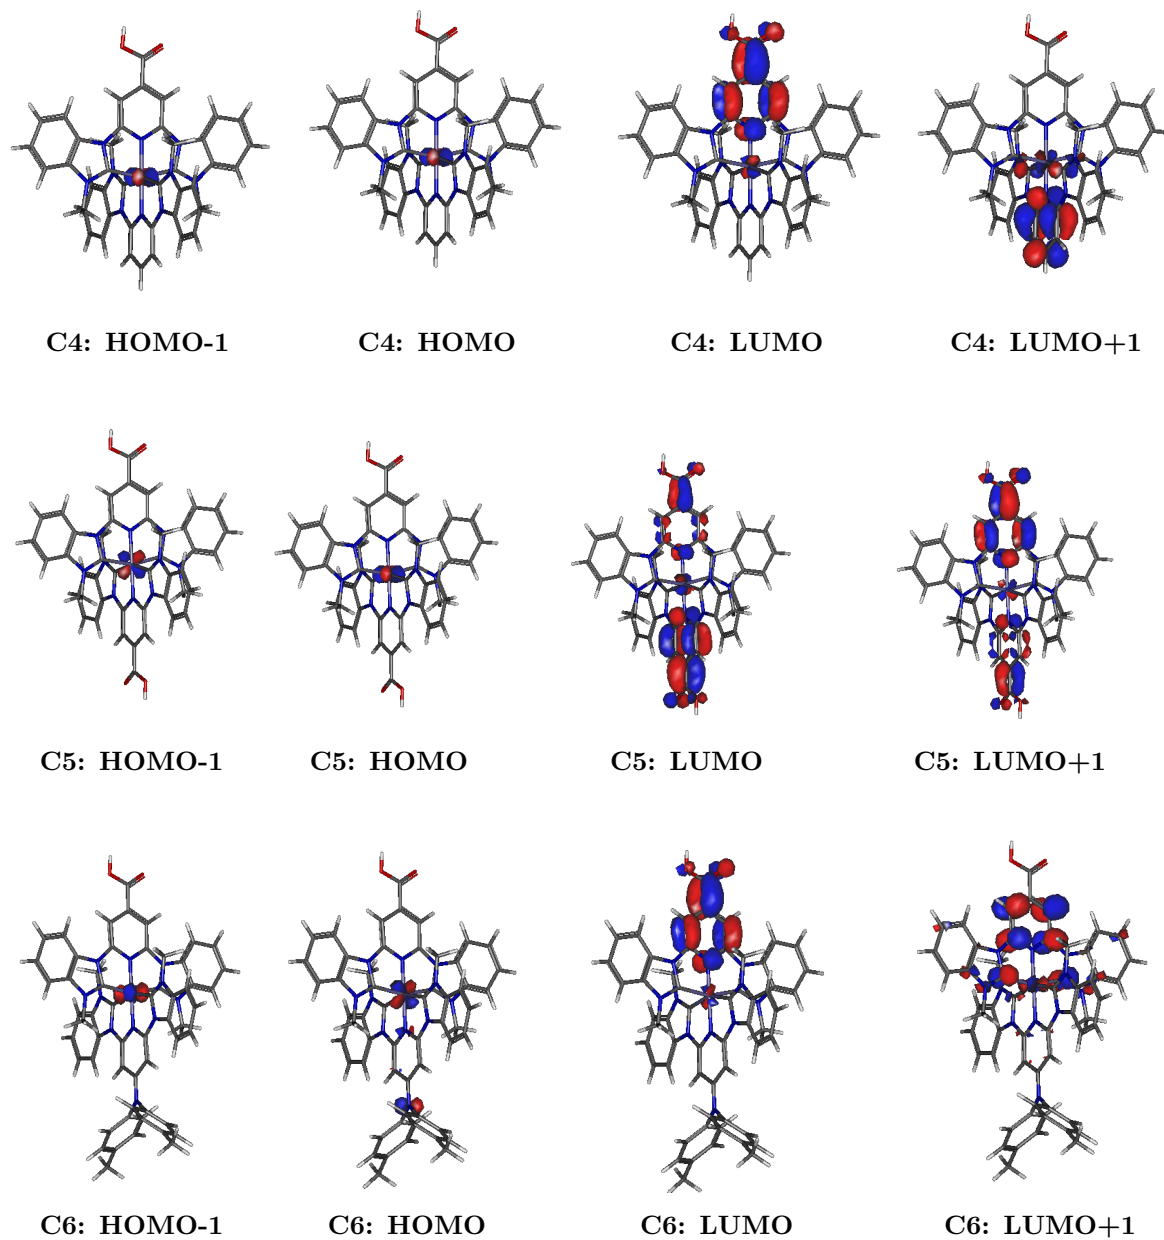

Figure S6: Frontier MOs (HOMO-1, HOMO, LUMO and LUMO+1) involved in the main transitions of iron dyes **C4** – **C6**. Isosurface value 0.02.

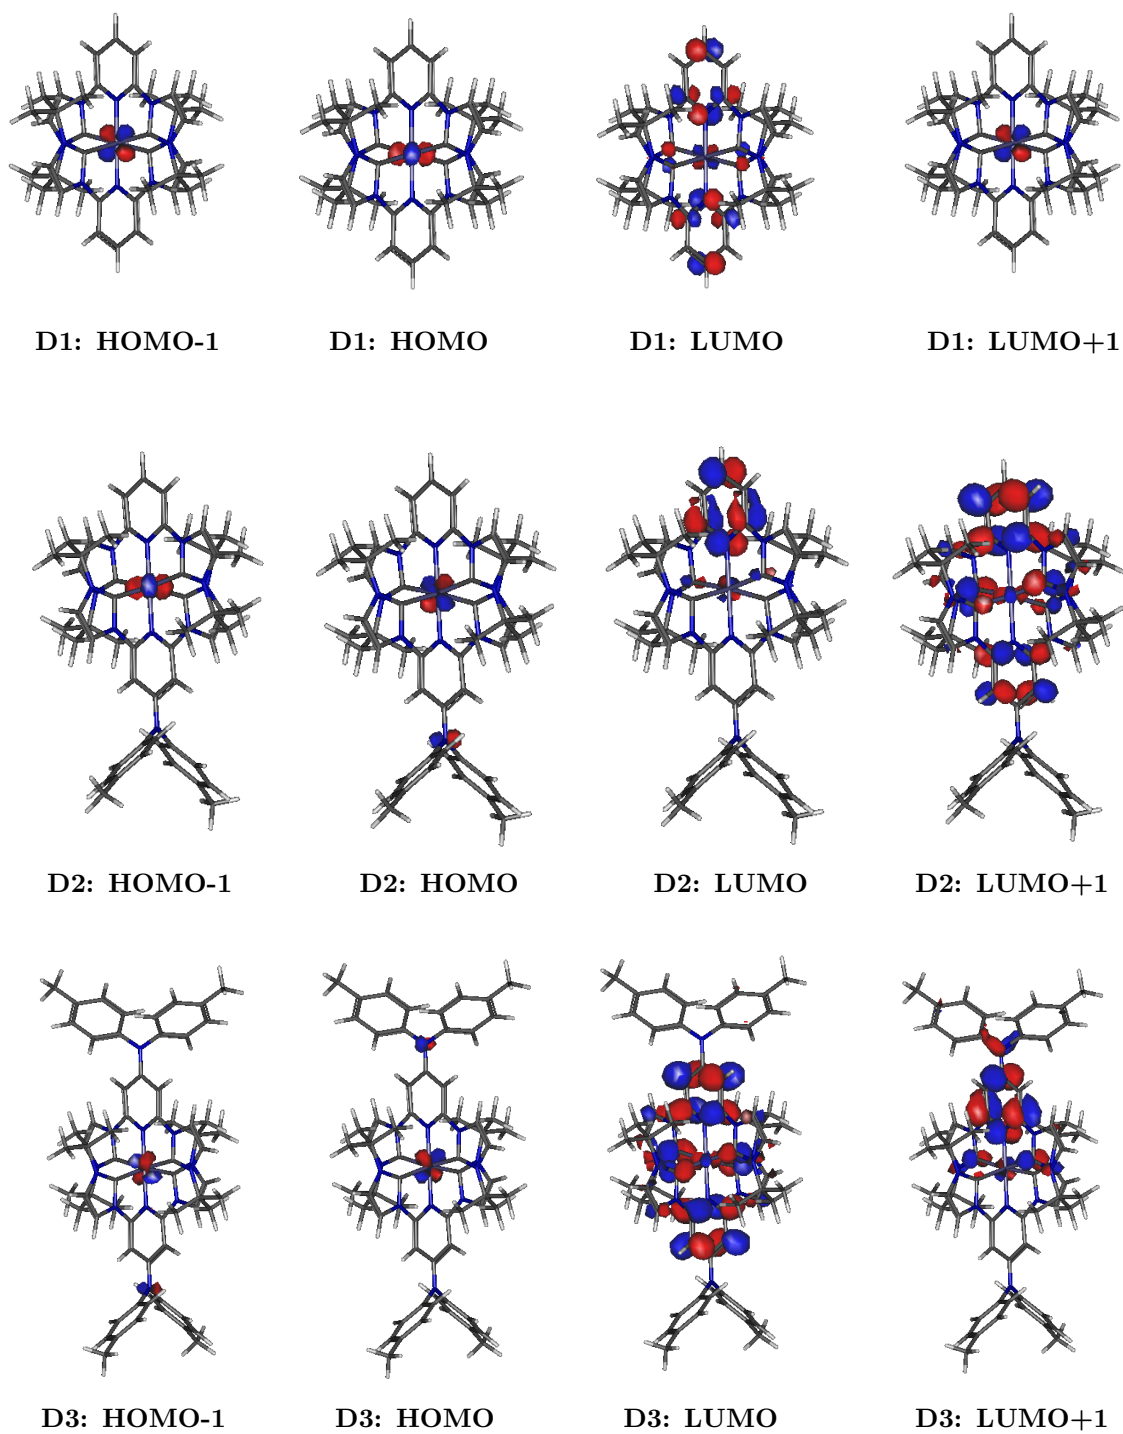

Figure S7: Frontier MOs (HOMO-1, HOMO, LUMO and LUMO+1) involved in the main transitions of iron dyes **D1** – **D3**. Isosurface value 0.02.

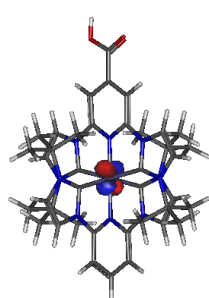

D4: HOMO-1

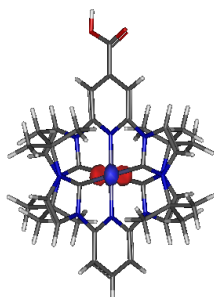

D4: HOMO

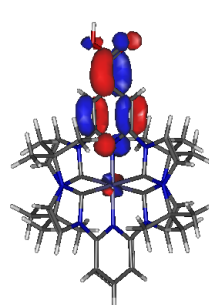

D4: LUMO

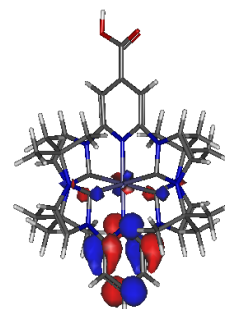

D4: LUMO+1

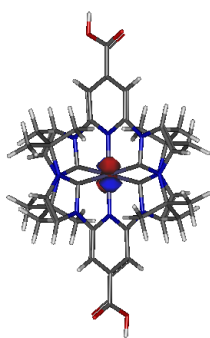

D5: HOMO-1

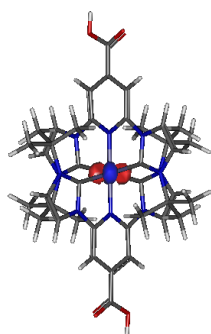

D5: HOMO

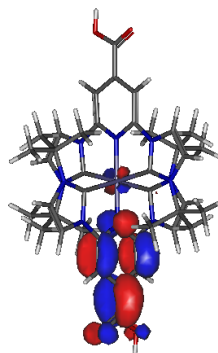

D5: LUMO

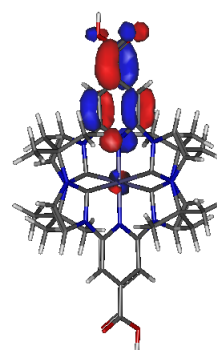

D5: LUMO+1

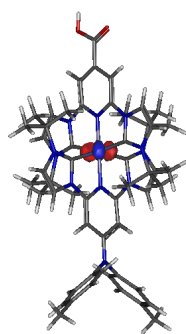

D6: HOMO-1

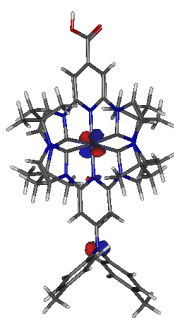

D6: HOMO

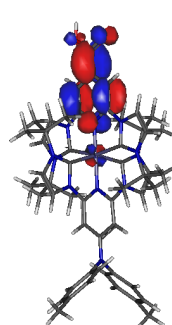

D6: LUMO

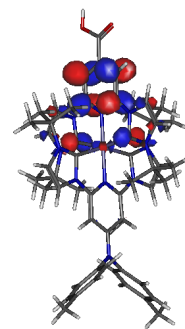

D6: LUMO+1

Figure S8: Frontier MOs (HOMO-1, HOMO, LUMO and LUMO+1) involved in the main transitions of iron dyes **D4** – **D6**. Isosurface value 0.02.

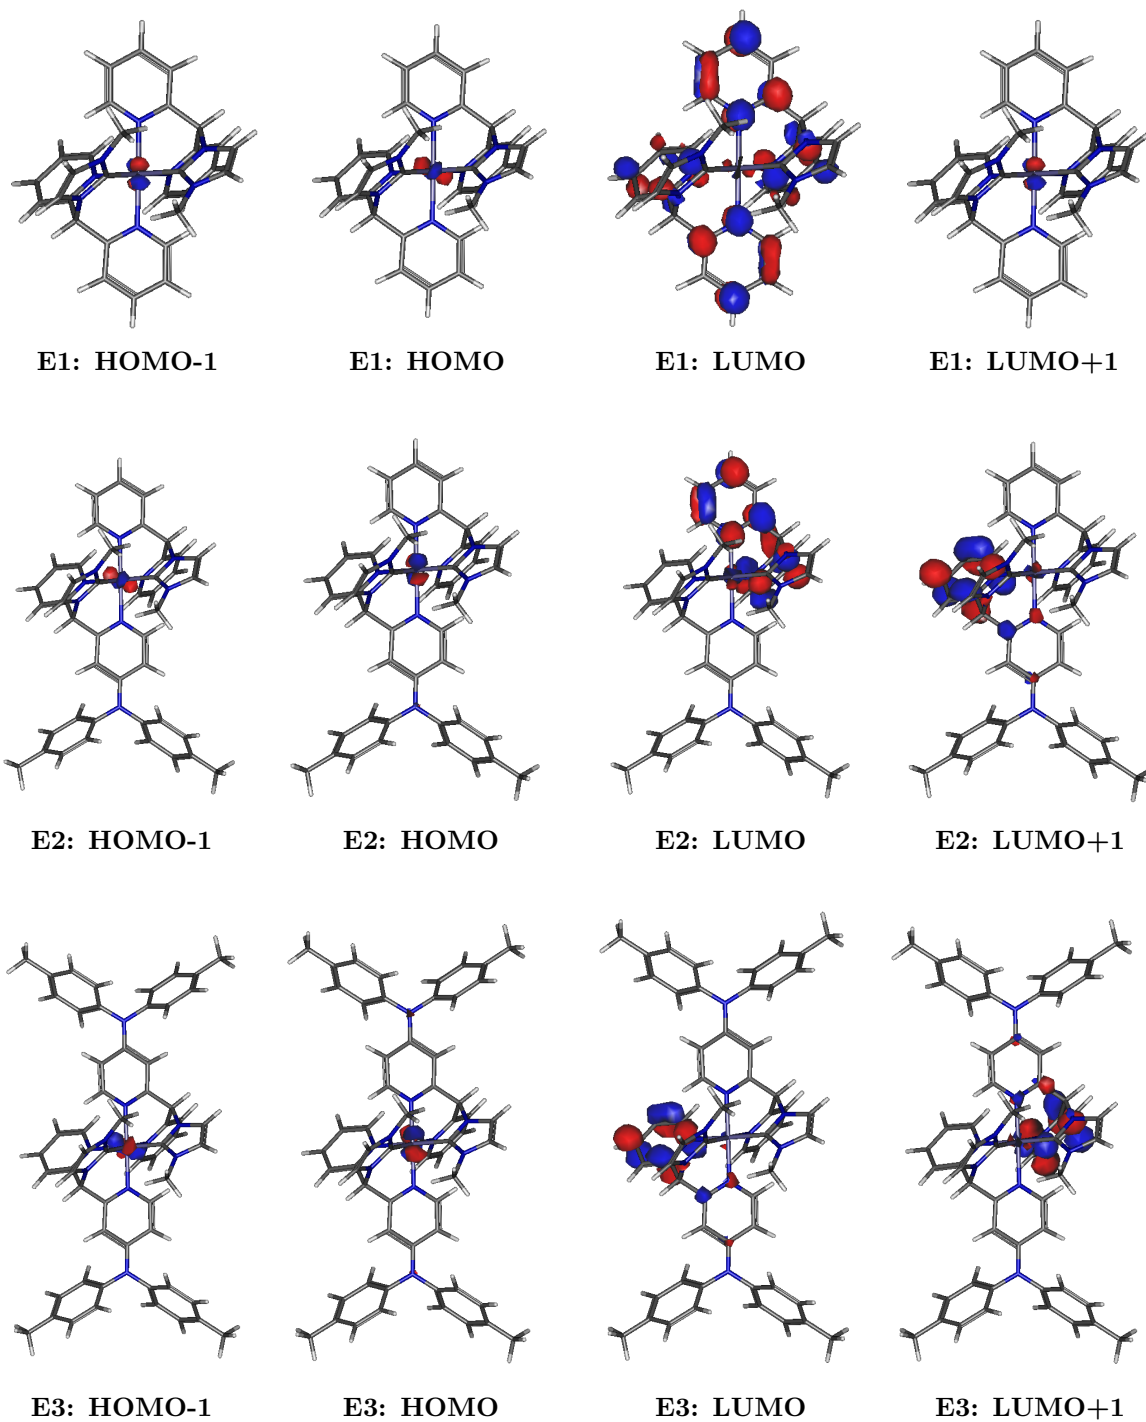

Figure S9: Frontier MOs (HOMO-1, HOMO, LUMO and LUMO+1) involved in the main transitions of iron dyes **E1** – **E3**. Isosurface value 0.02.

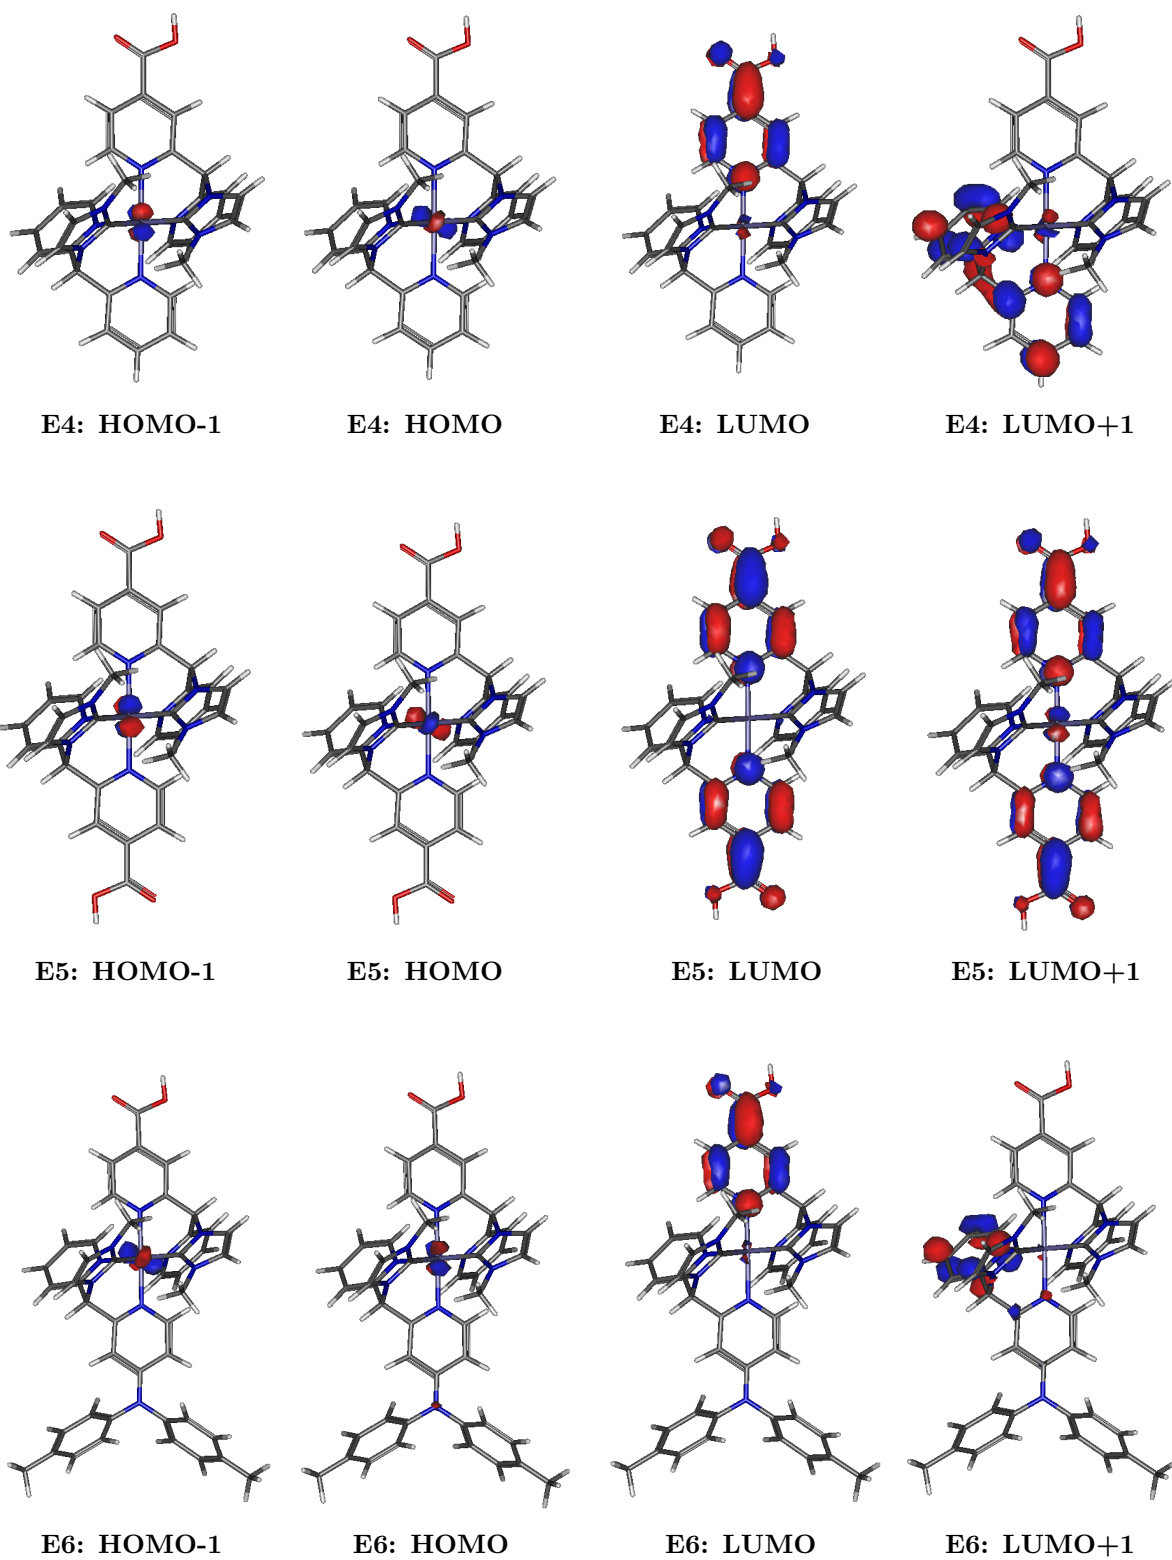

Figure S10: Frontier MOs (HOMO-1, HOMO, LUMO and LUMO+1) involved in the main transitions of iron dyes **E4** – **E6**. Isosurface value 0.02.



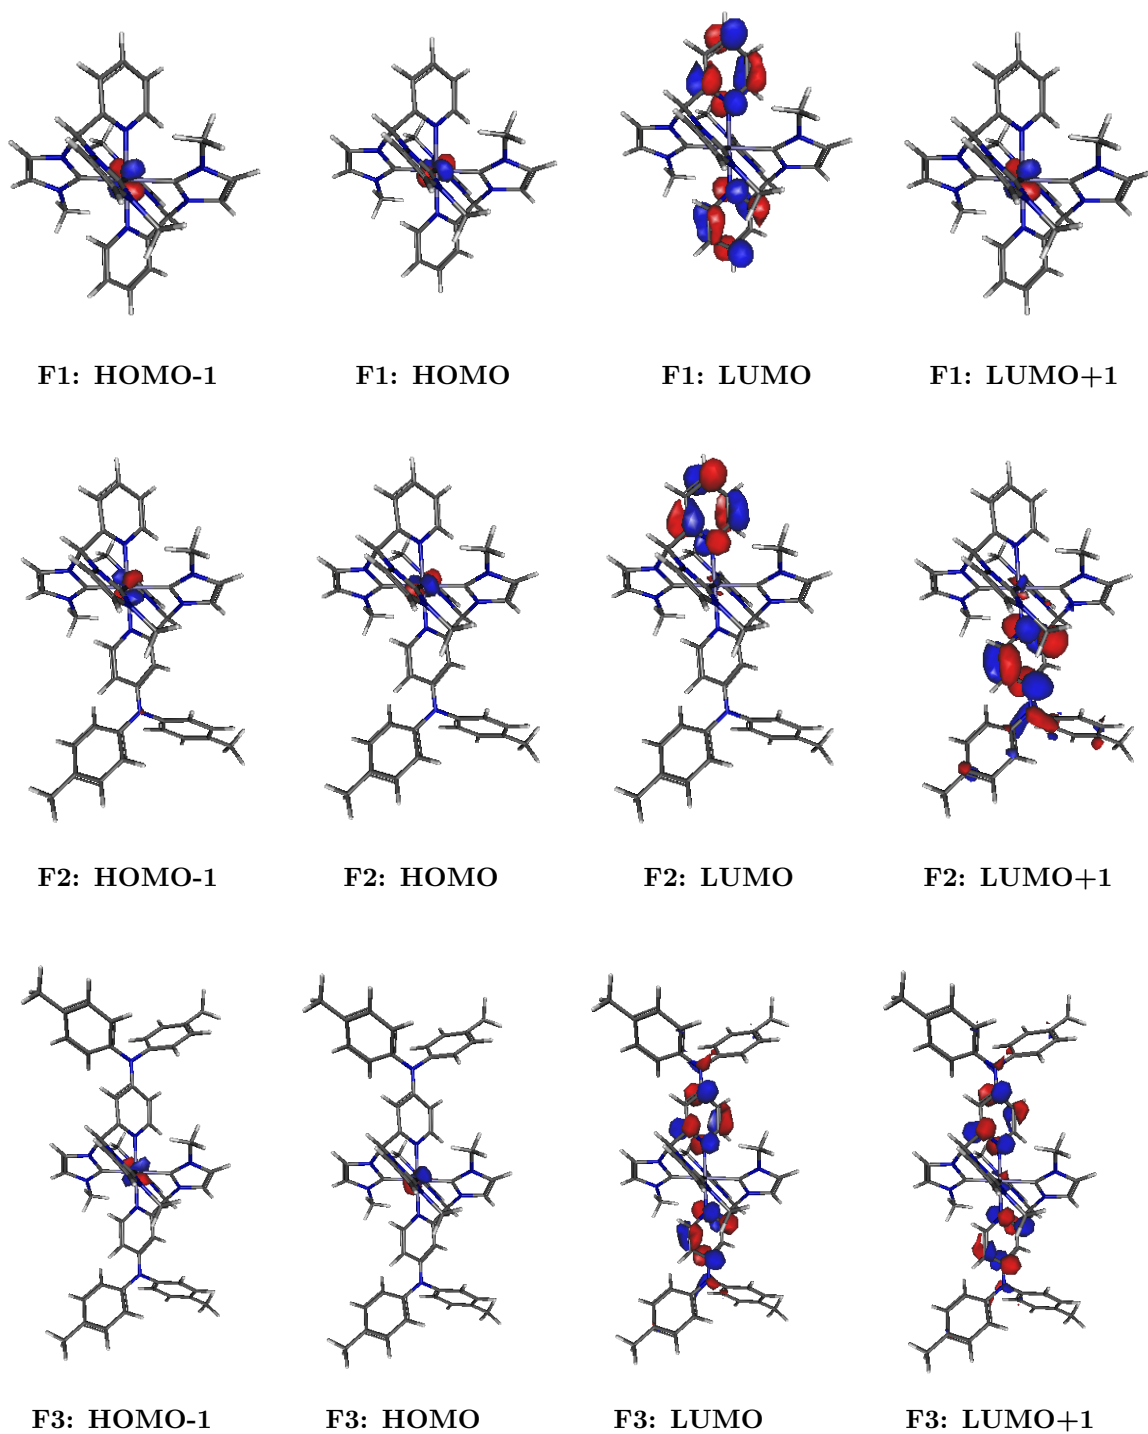

Figure S11: Frontier MOs (HOMO-1, HOMO, LUMO and LUMO+1) involved in the main transitions of iron dyes **F1** – **F3**. Isosurface value 0.02.



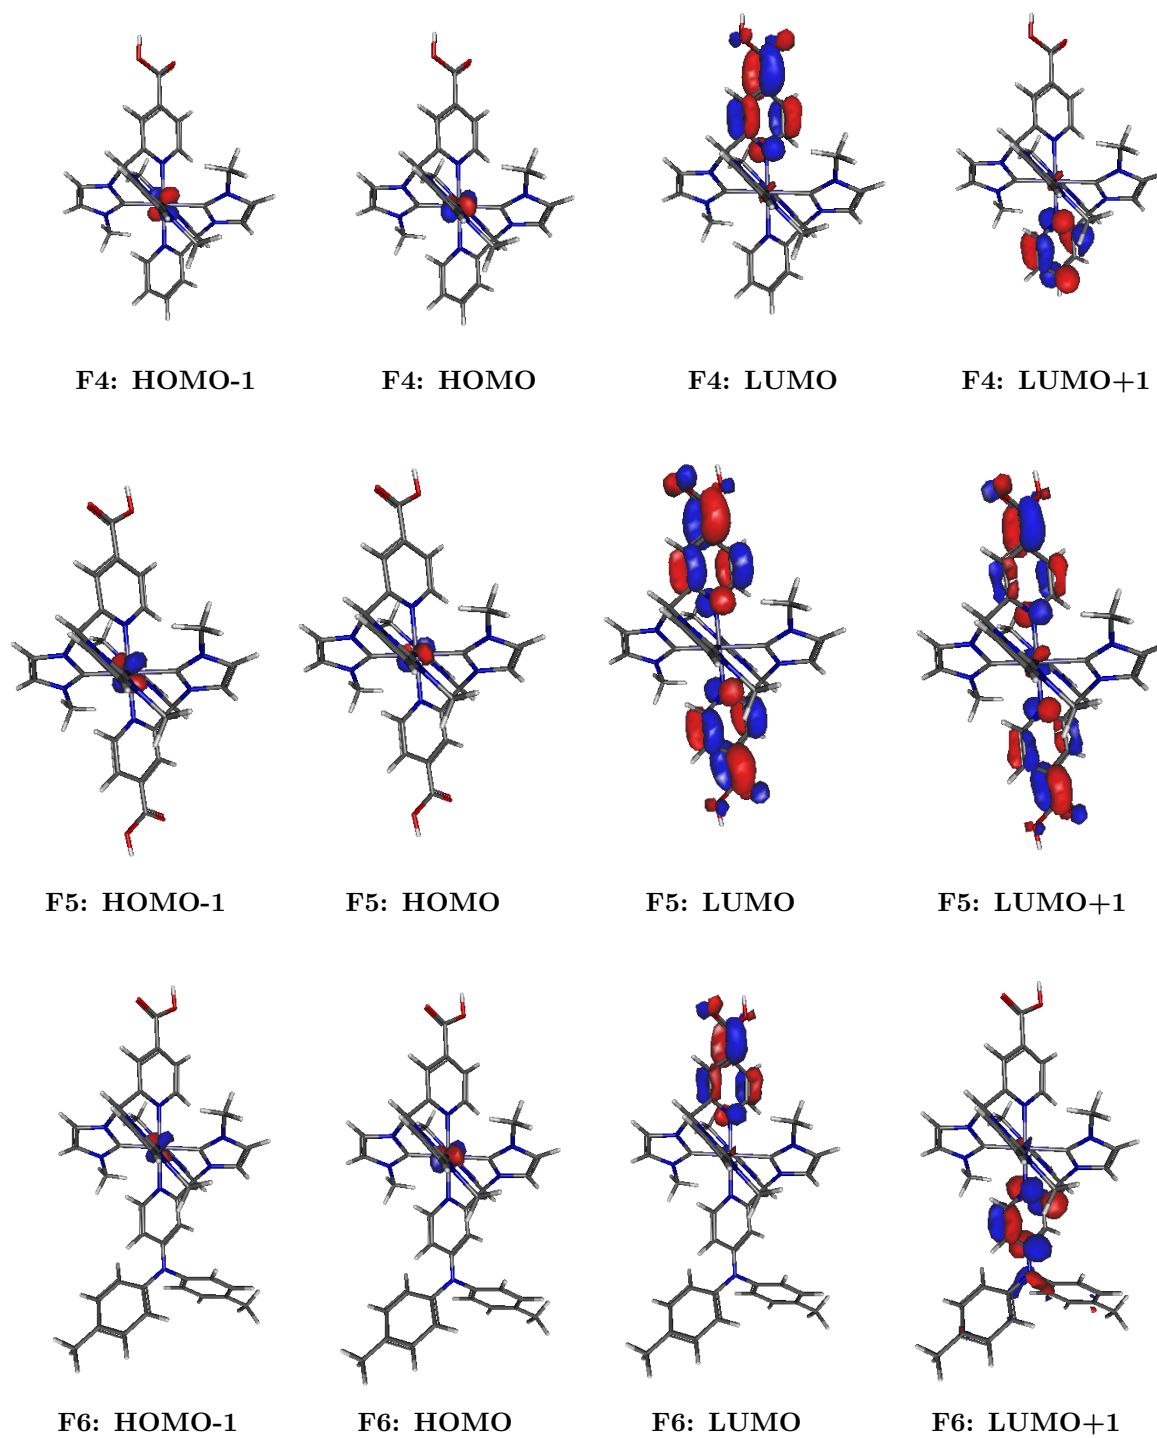

Figure S12: Frontier MOs (HOMO-1, HOMO, LUMO and LUMO+1) involved in the main transitions of iron dyes **F4** – **F6**. Isosurface value 0.02.

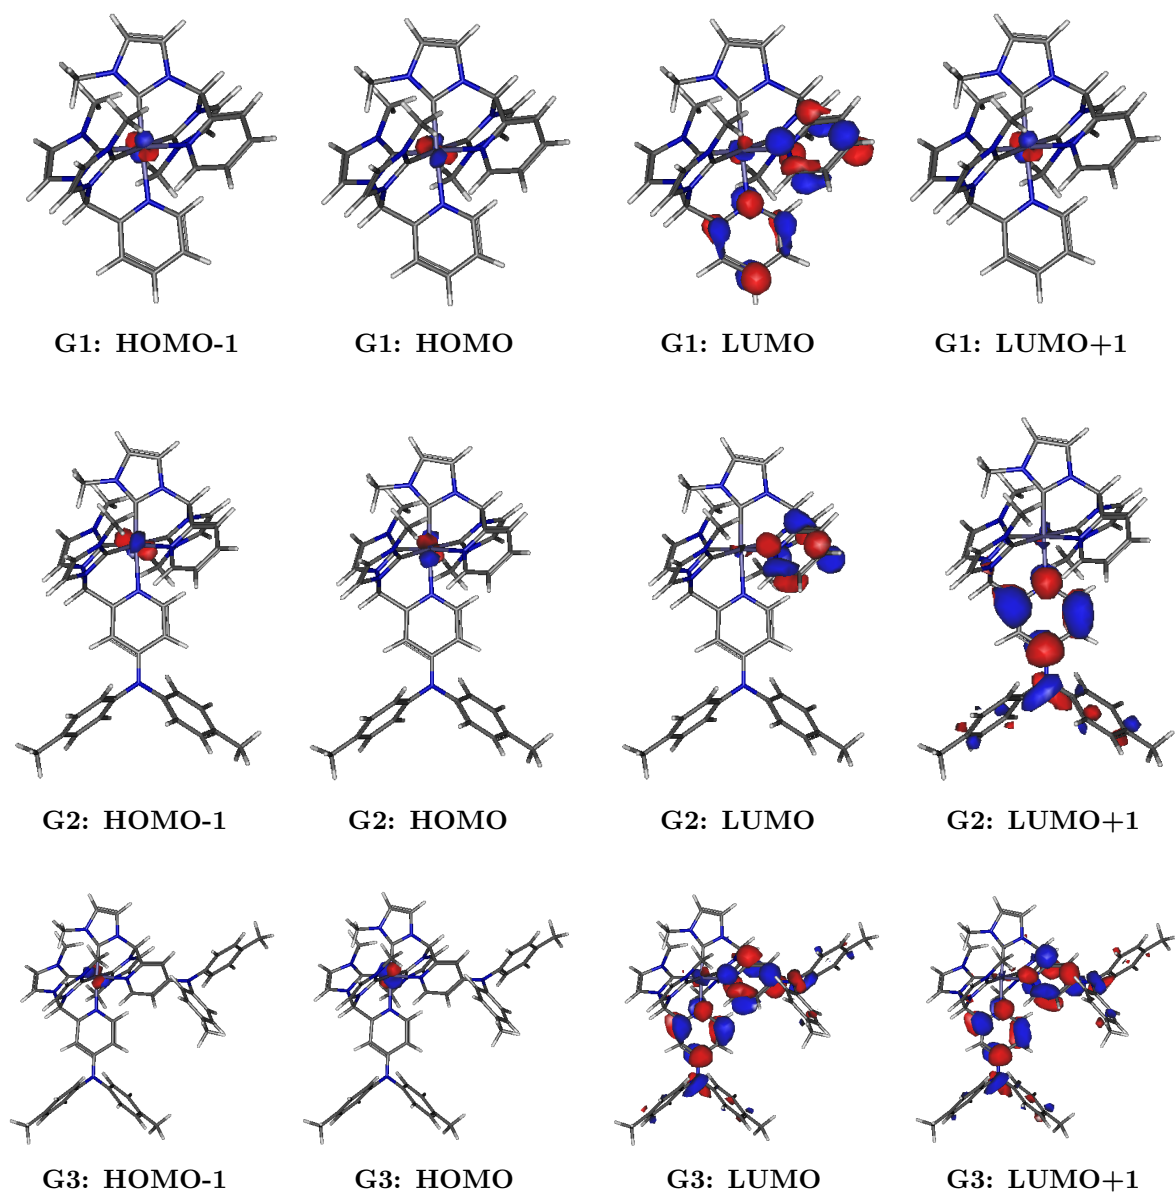

Figure S13: Frontier MOs (HOMO-1, HOMO, LUMO and LUMO+1) involved in the main transitions of iron dyes **G1** – **G3**. Isosurface value 0.02.

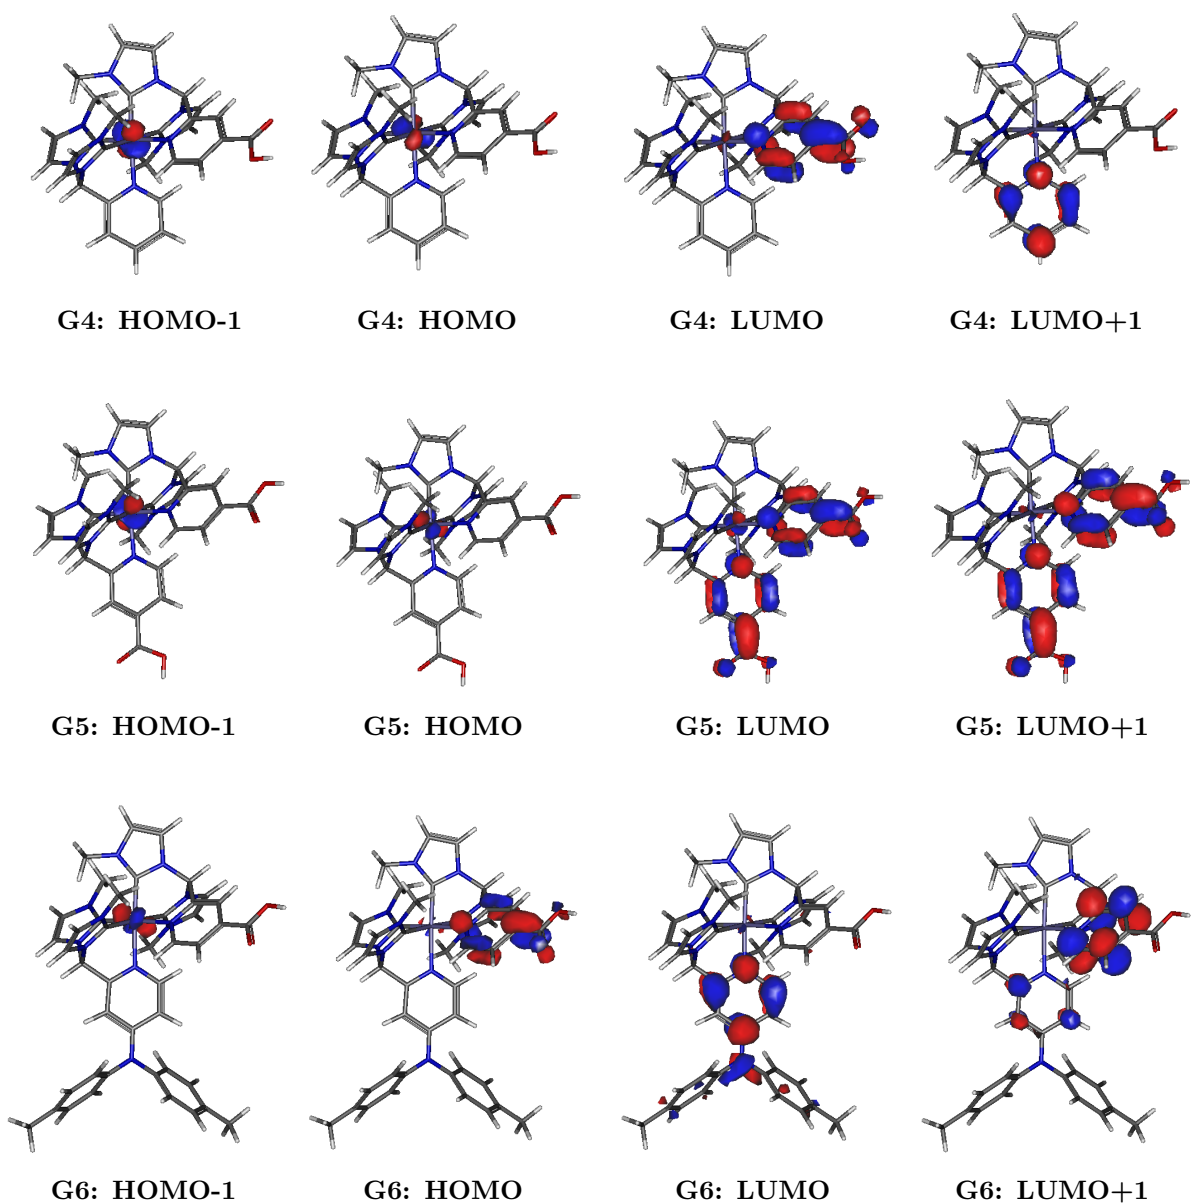

Figure S14: Frontier MOs (HOMO-1, HOMO, LUMO and LUMO+1) involved in the main transitions of iron dyes **G4** – **G6**. Isosurface value 0.02.

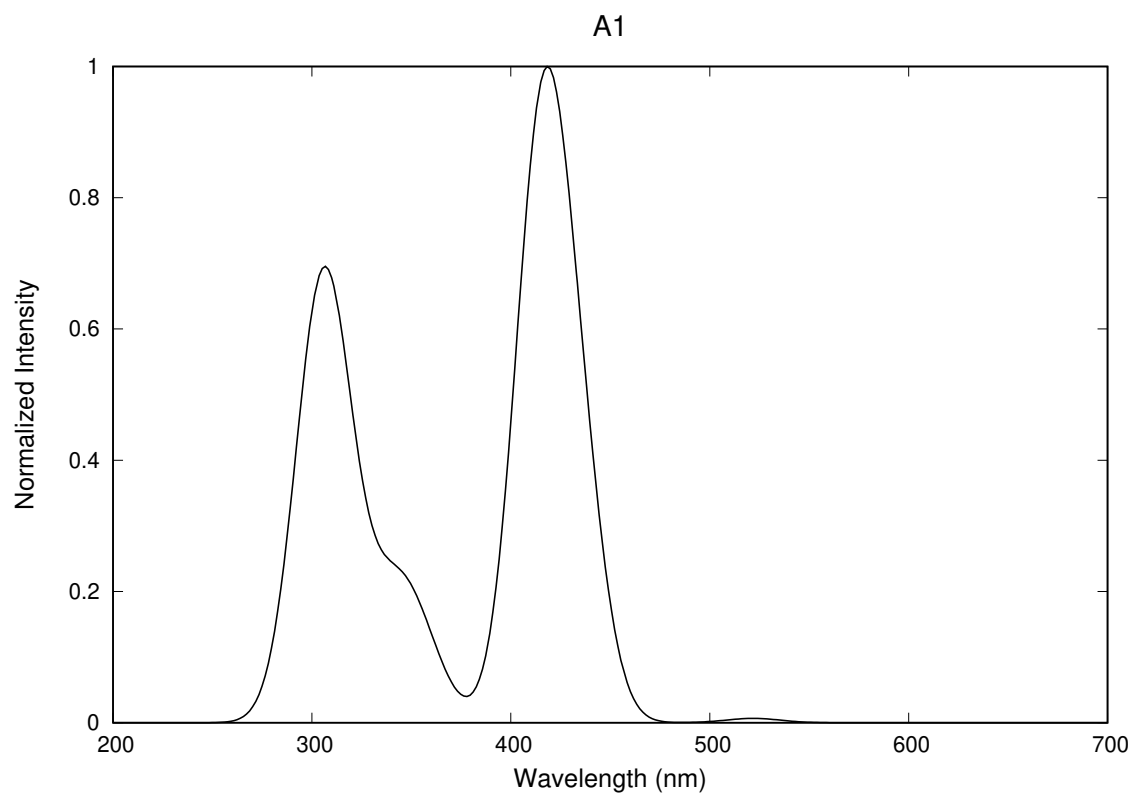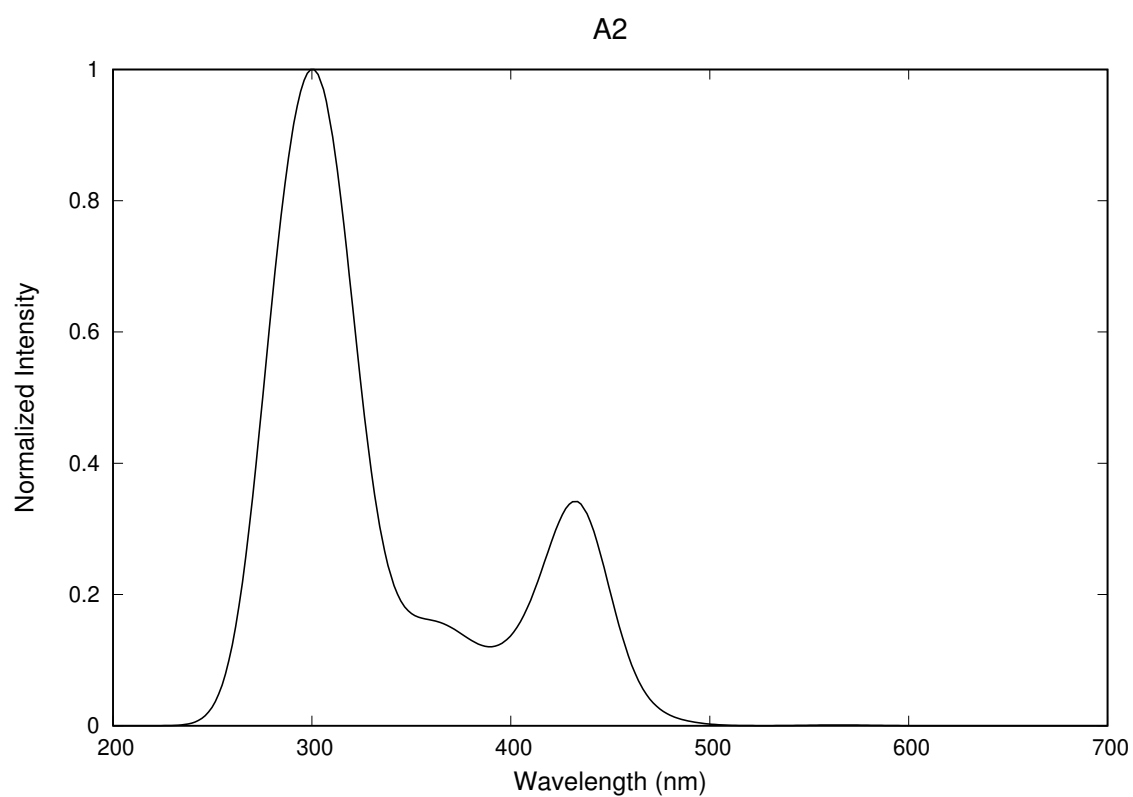

Figure S15: Calculated normalized absorption UV-vis spectra of iron dyes **A1** and **A2**.

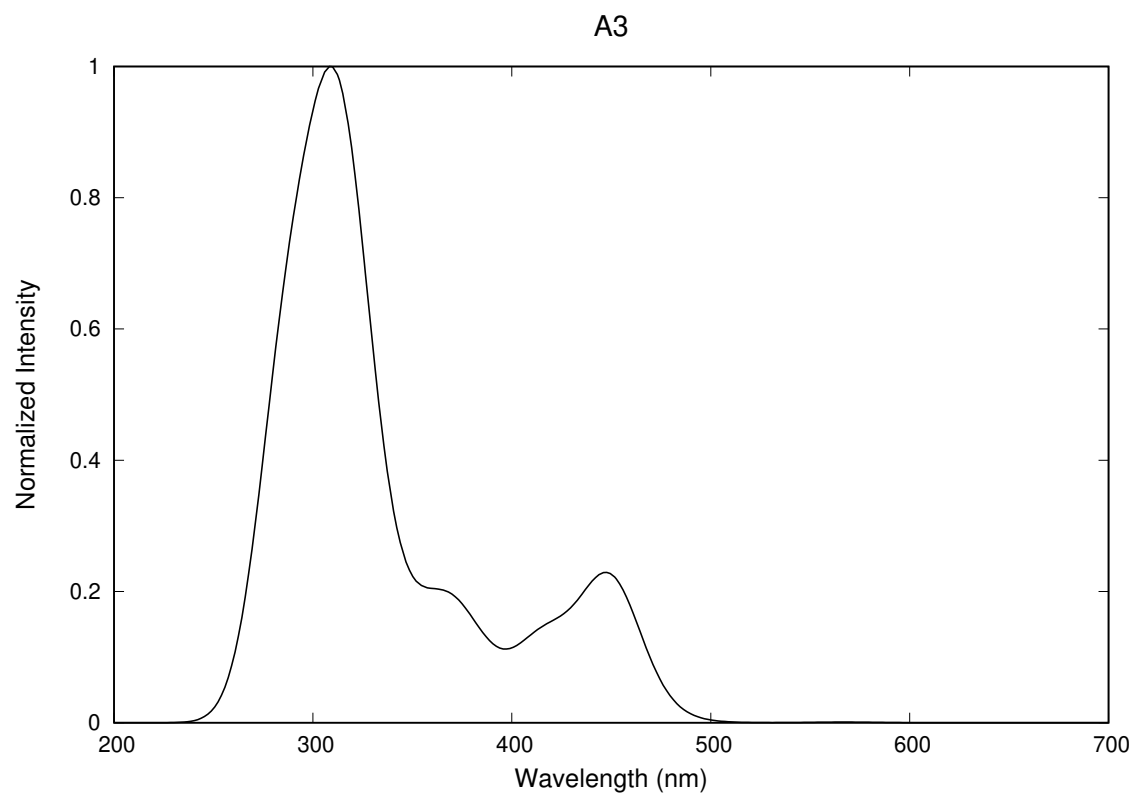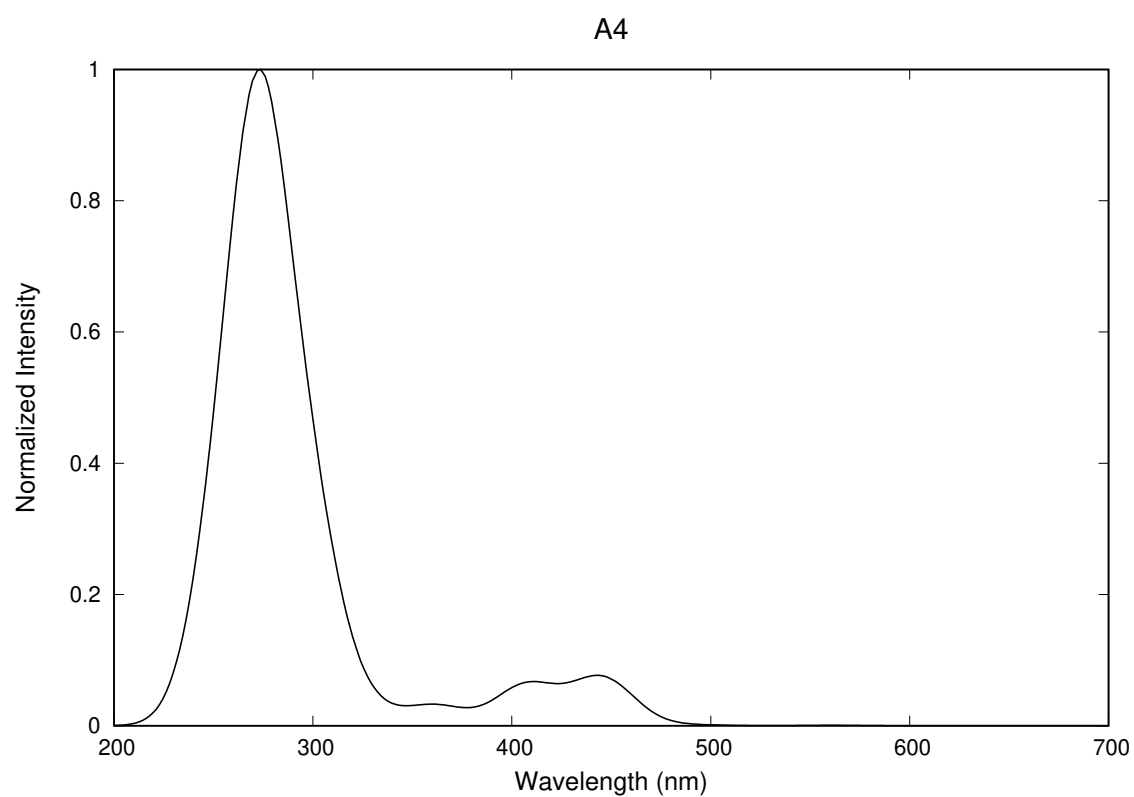

Figure S16: Calculated normalized absorption UV-vis spectra of iron dyes **A3** and **A4**.

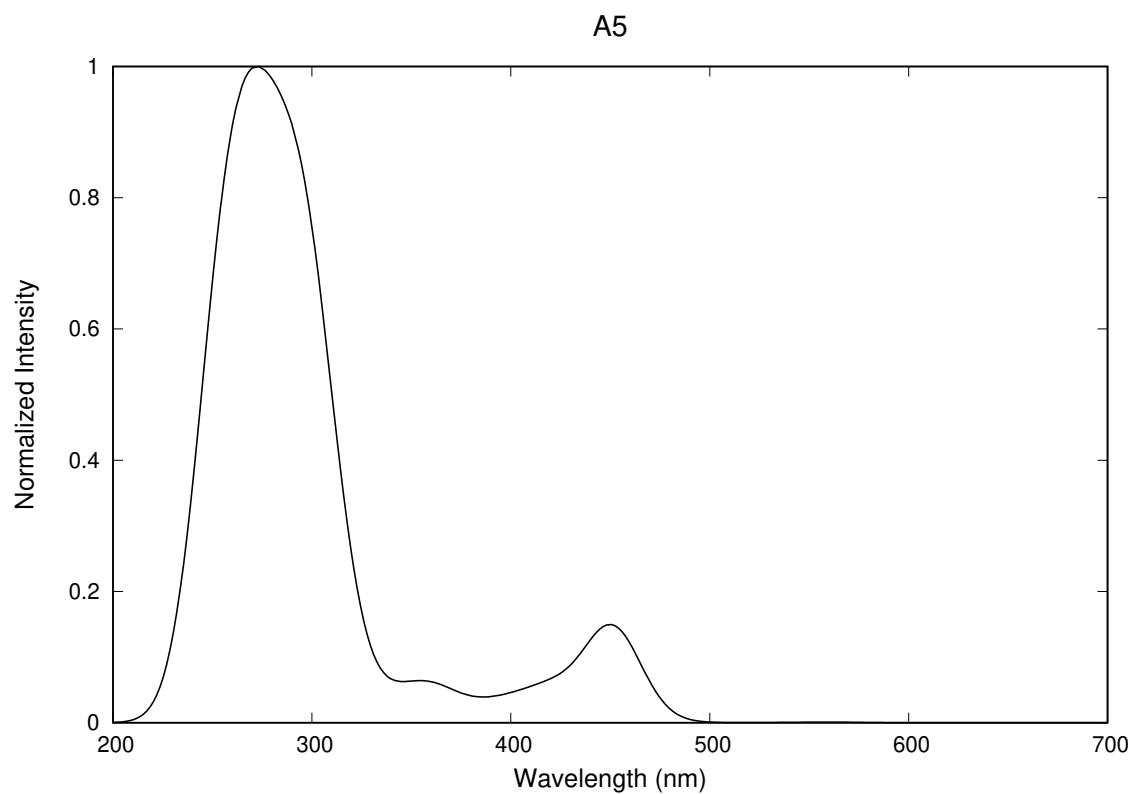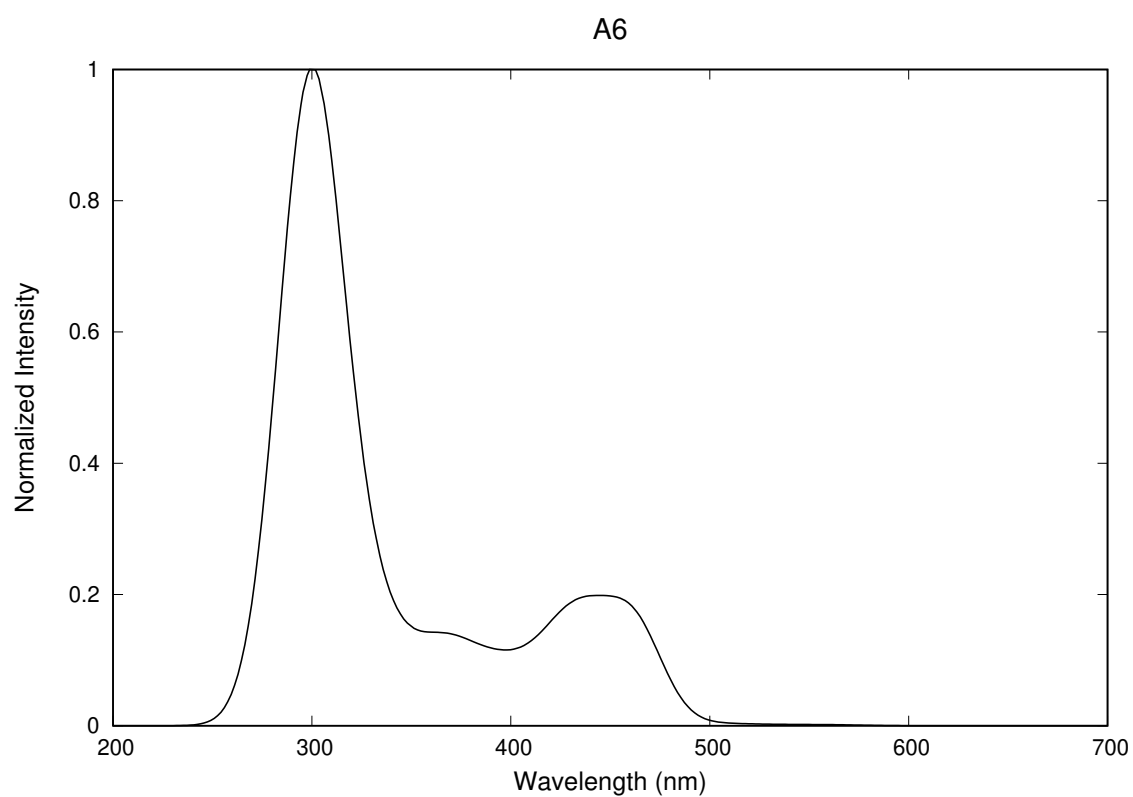

Figure S17: Calculated normalized absorption UV-vis spectra of iron dyes **A5** and **A6**.

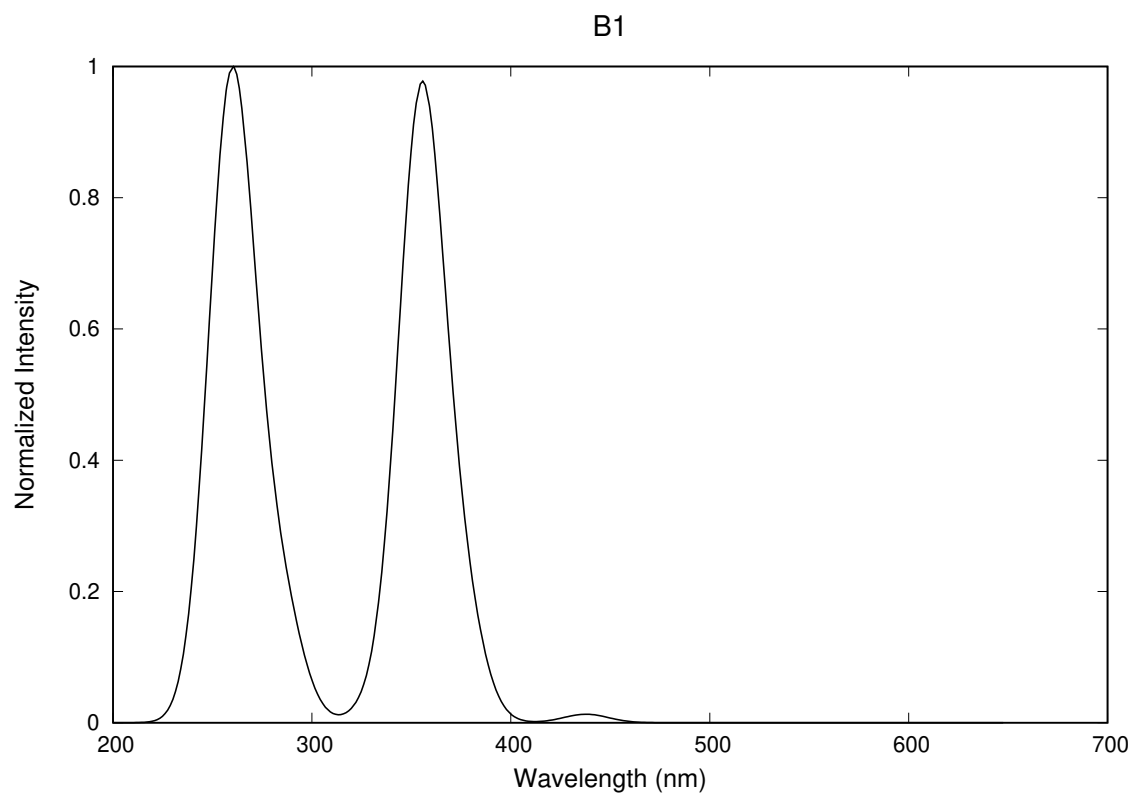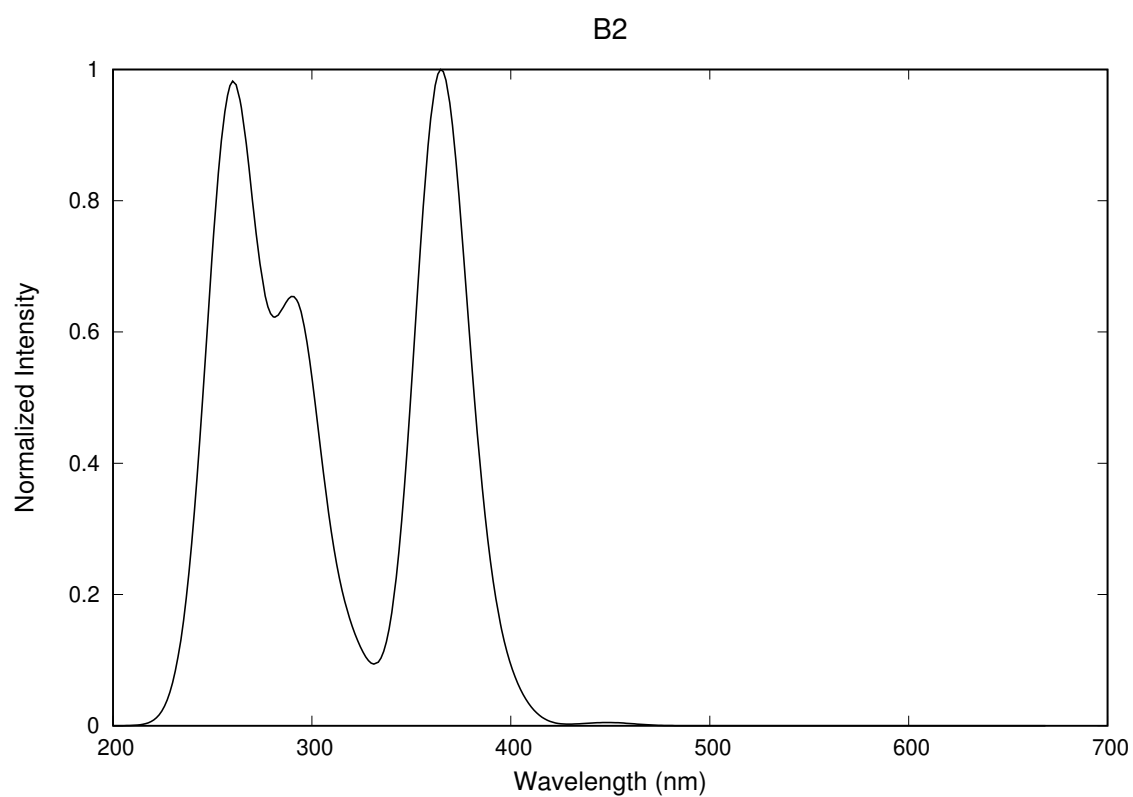

Figure S18: Calculated normalized absorption UV-vis spectra of iron dyes **B1** and **B2**.

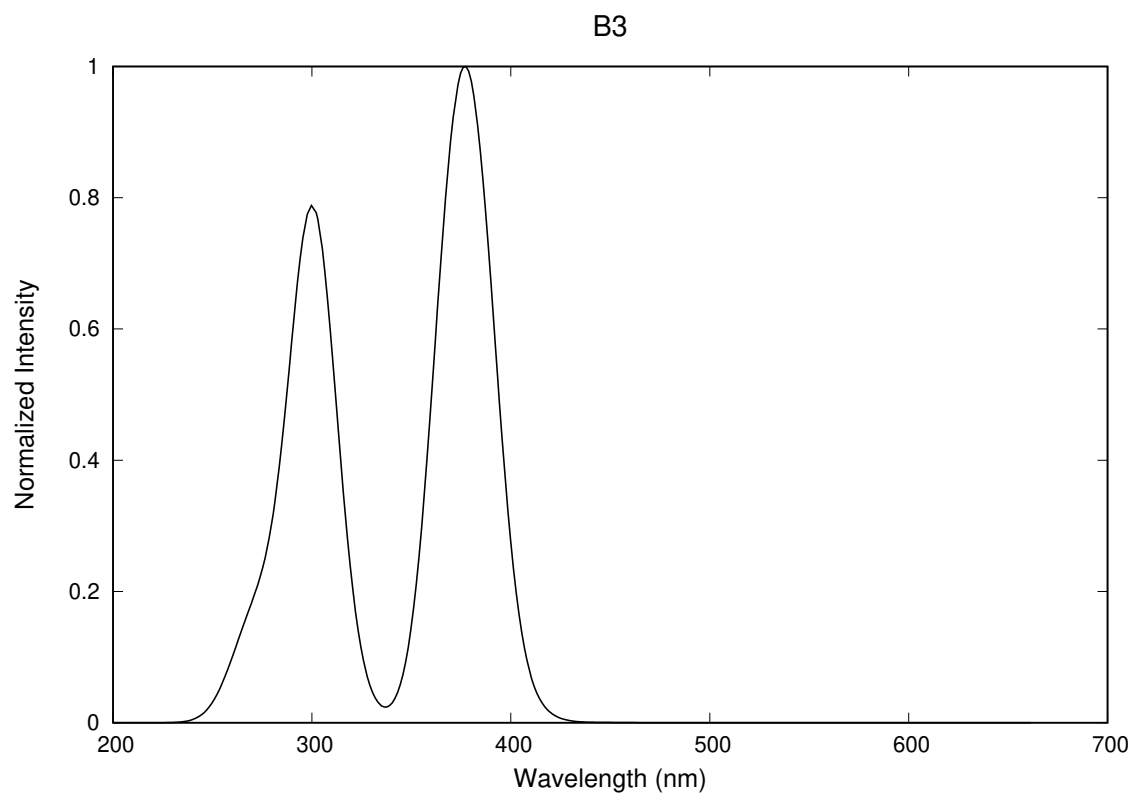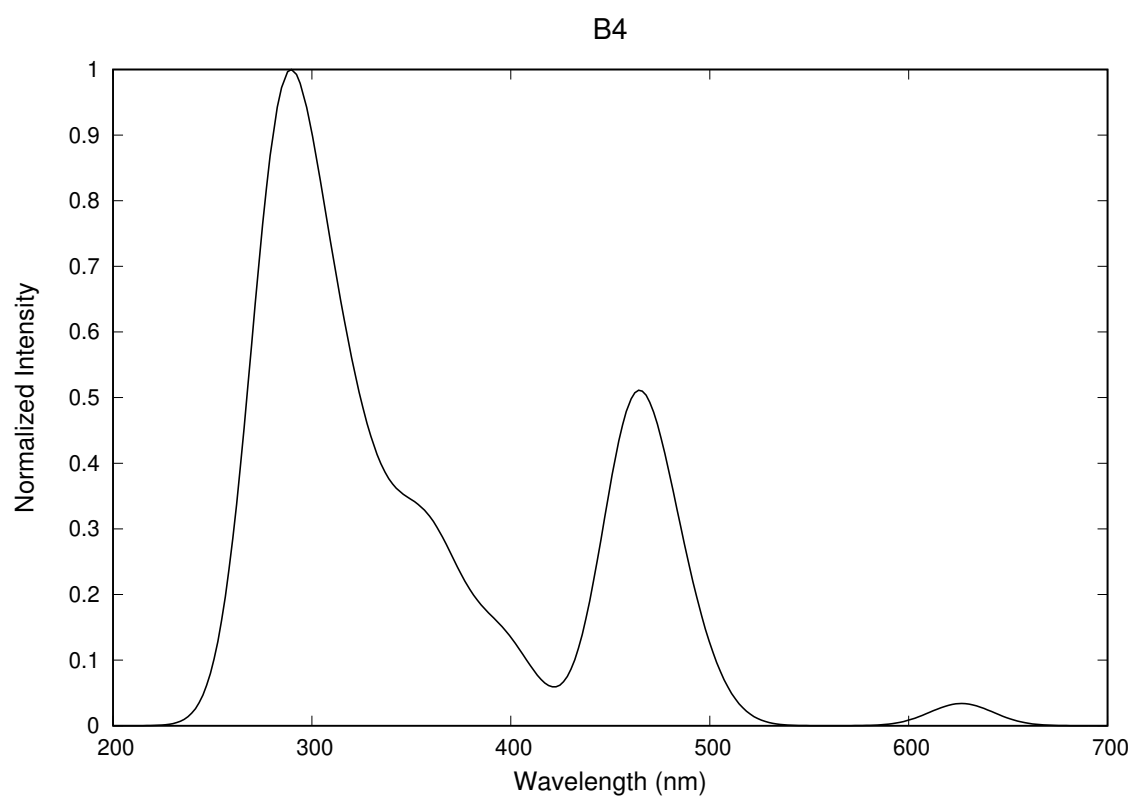

Figure S19: Calculated normalized absorption UV-vis spectra of iron dyes **B3** and **B4**.



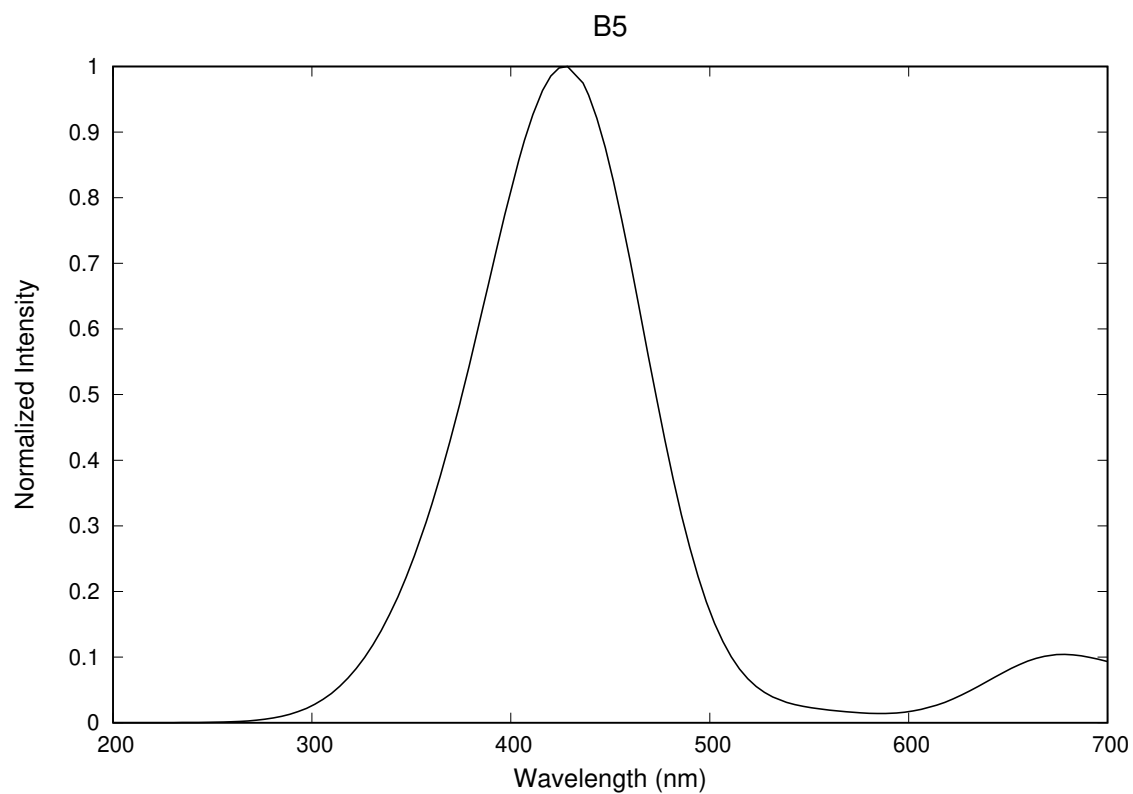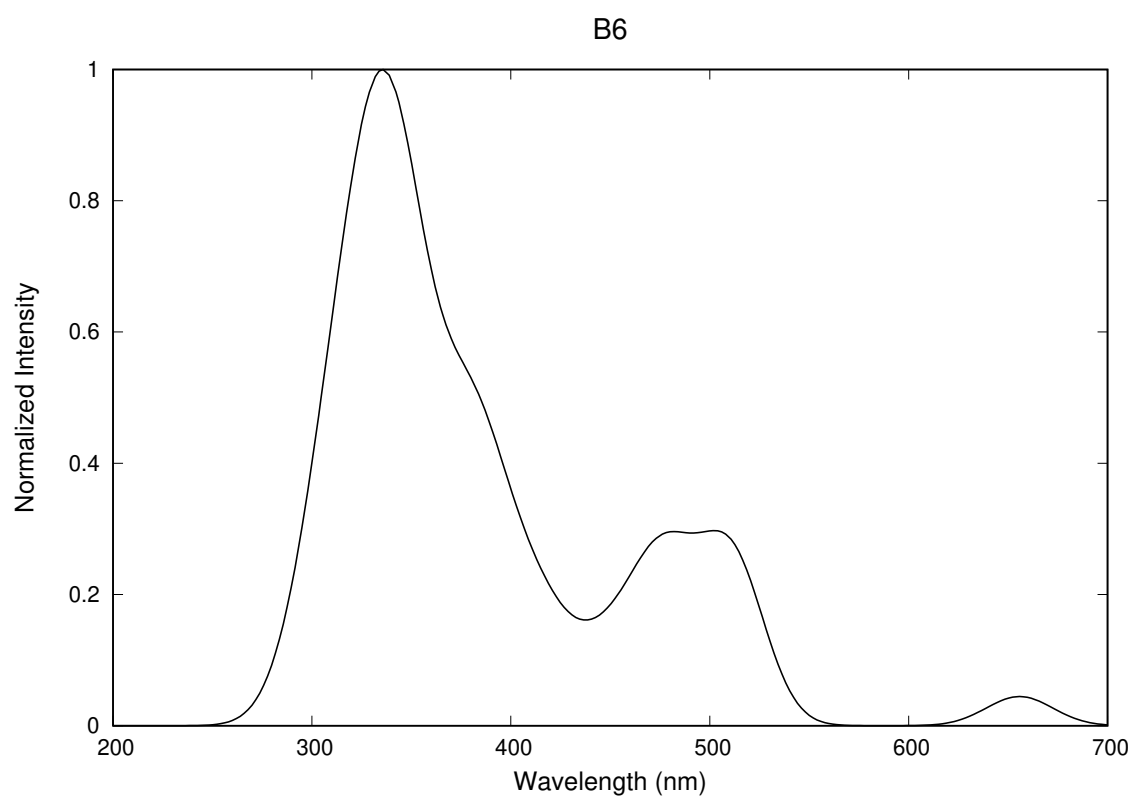

Figure S20: Calculated normalized absorption UV-vis spectra of iron dyes **B5** and **B6**.

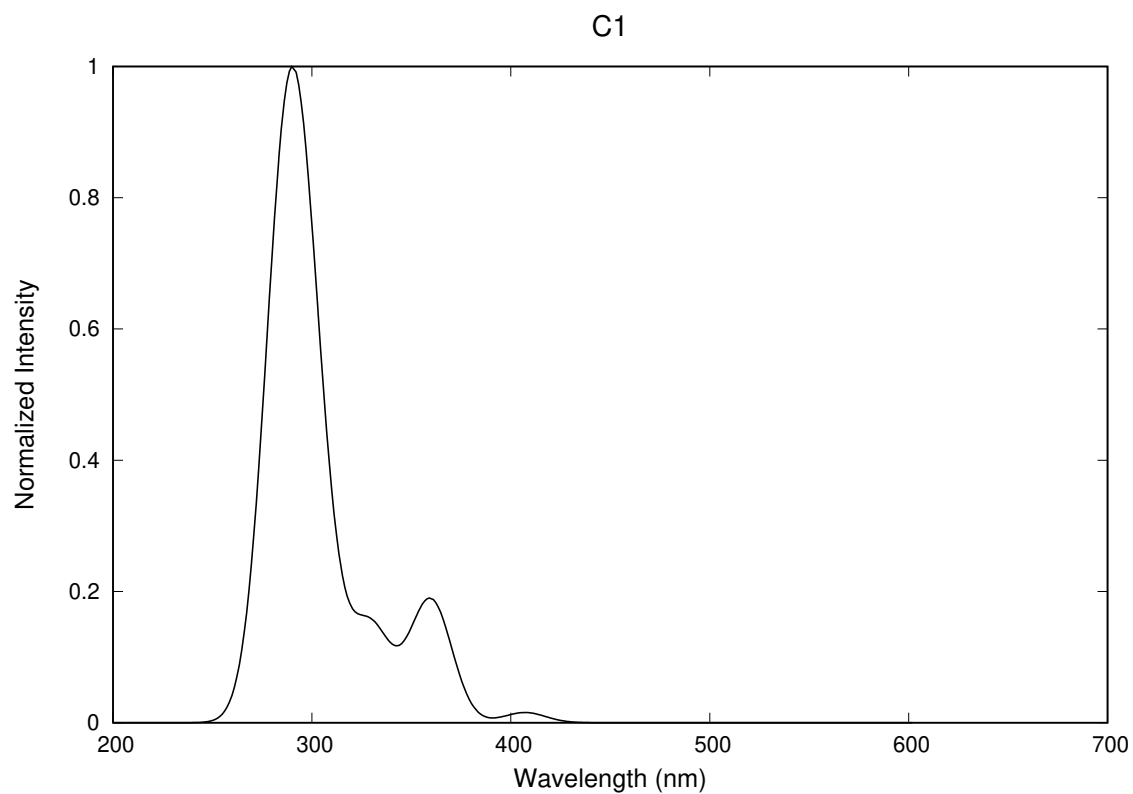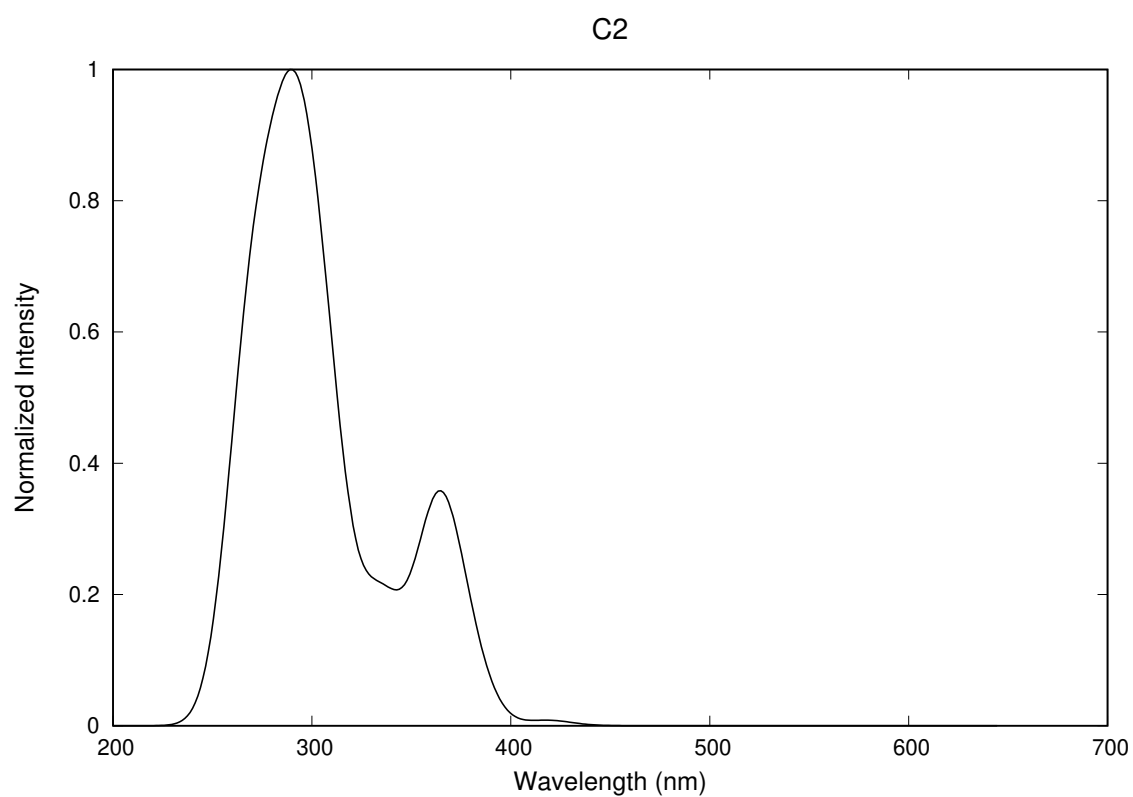

Figure S21: Calculated normalized absorption UV-vis spectra of iron dyes **C1** and **C2**.

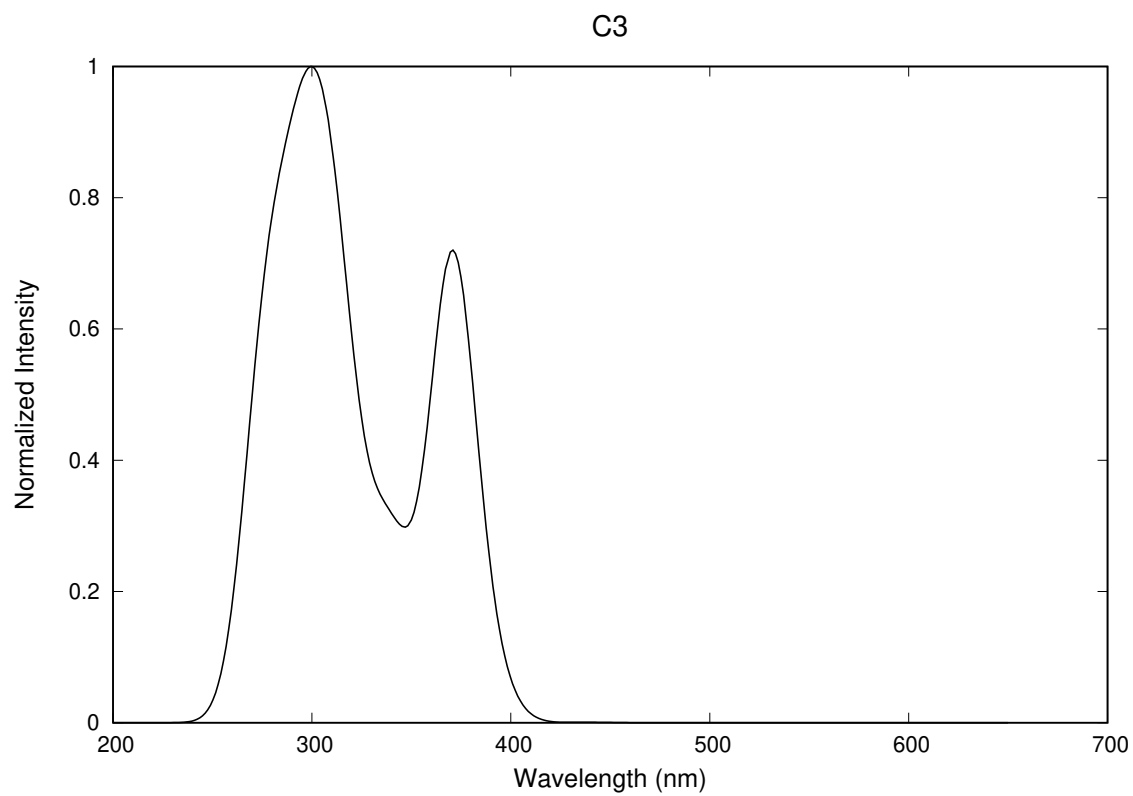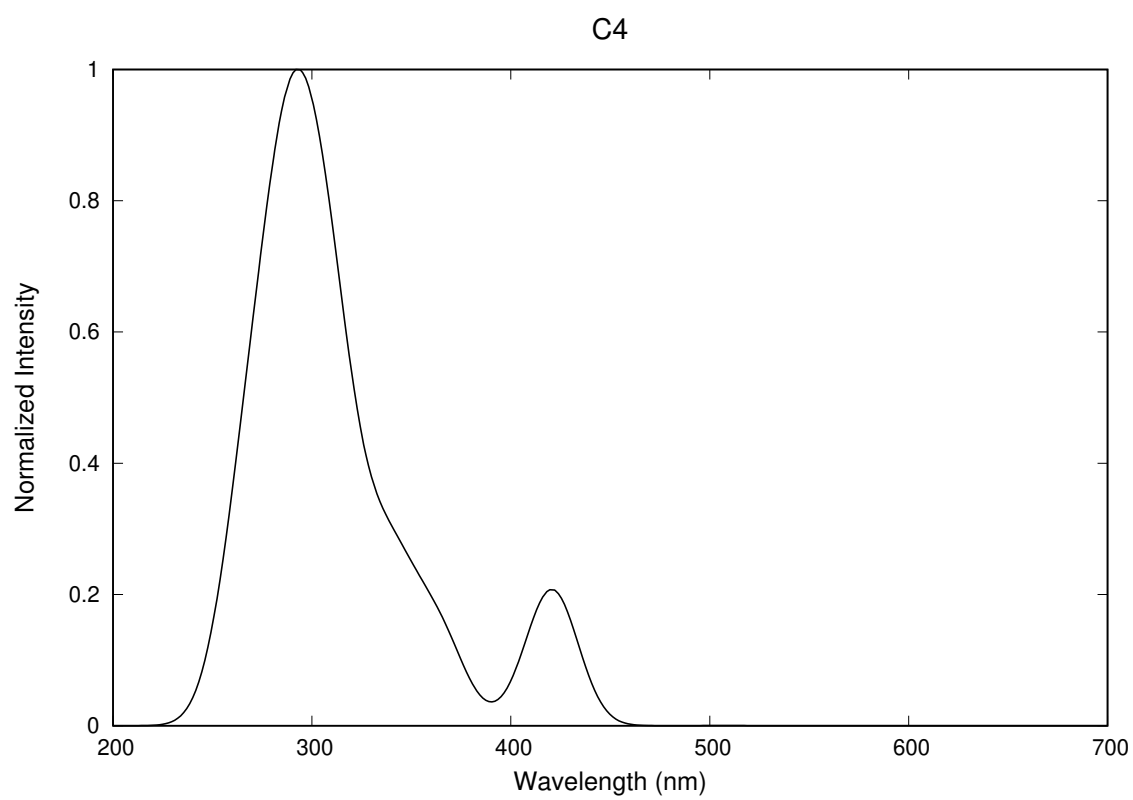

Figure S22: Calculated normalized absorption UV-vis spectra of iron dyes **C3** and **C4**.

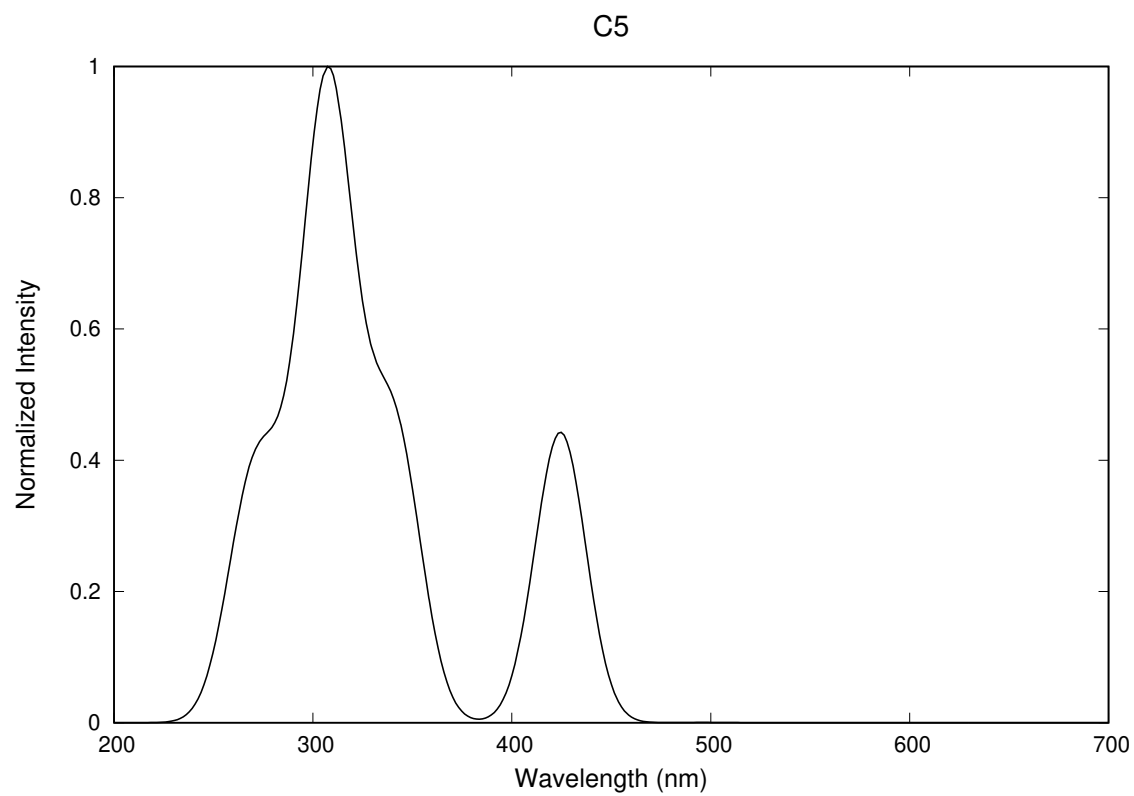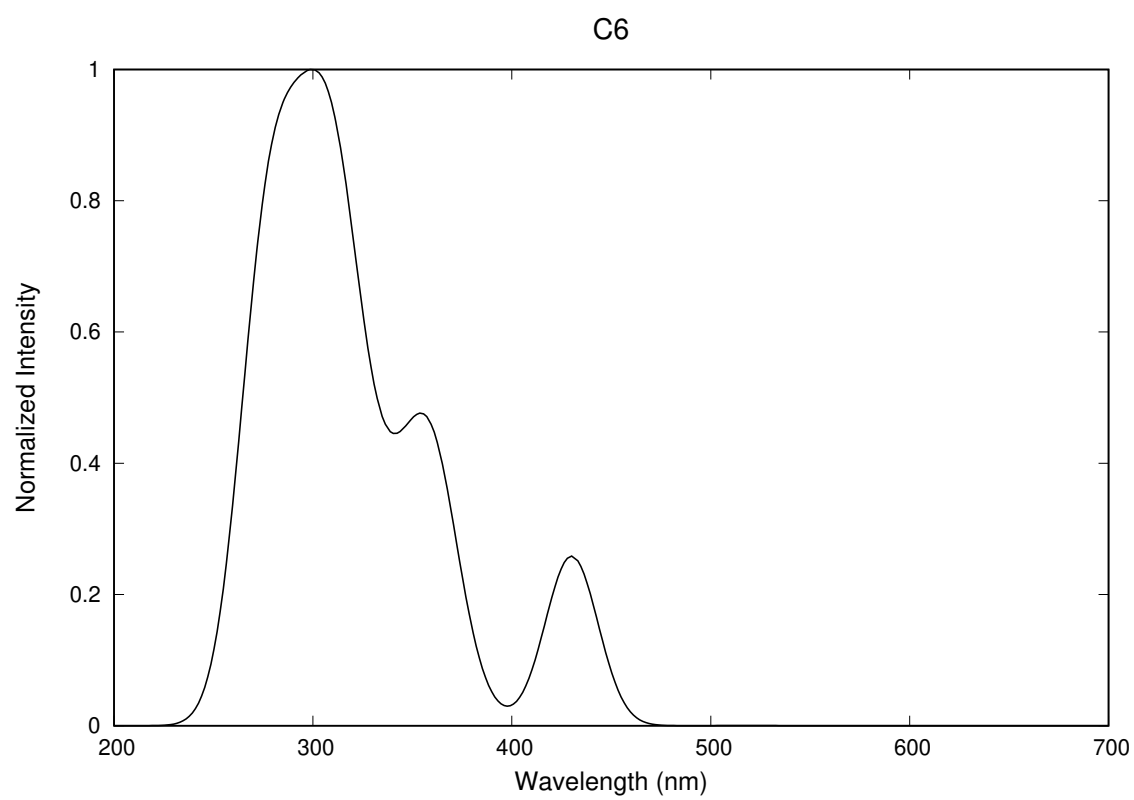

Figure S23: Calculated normalized absorption UV-vis spectra of iron dyes **C5** and **C6**.

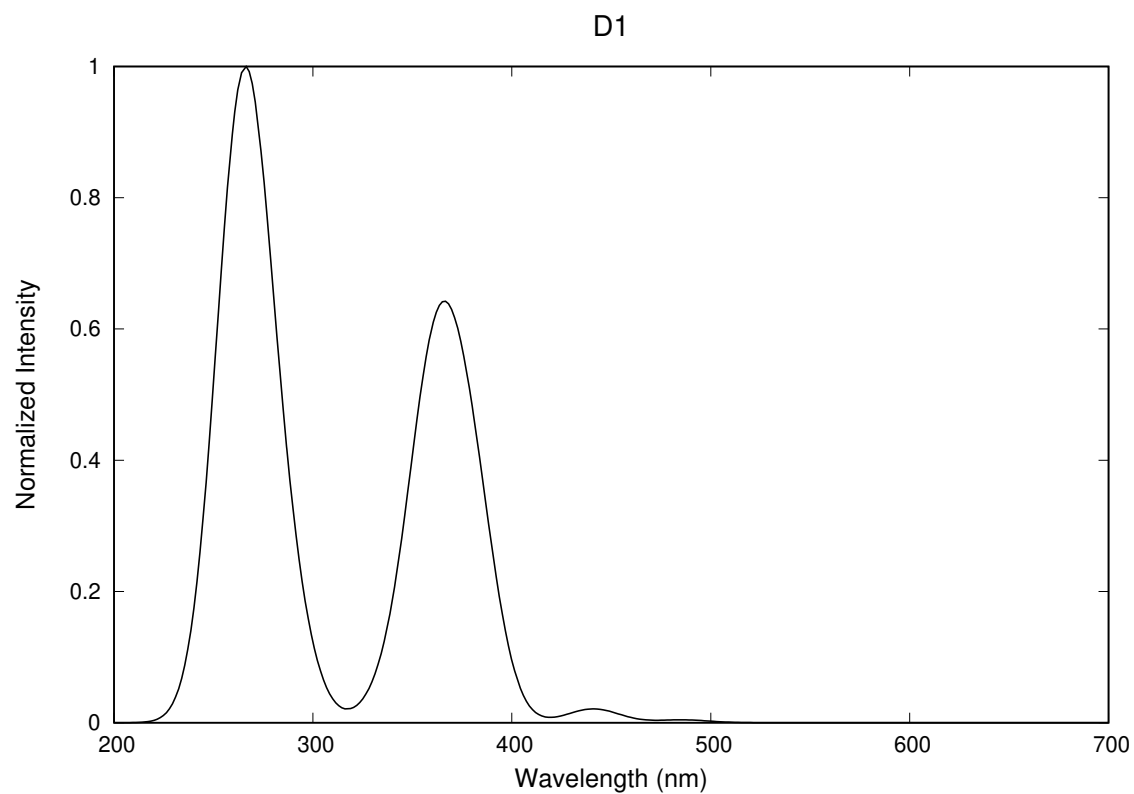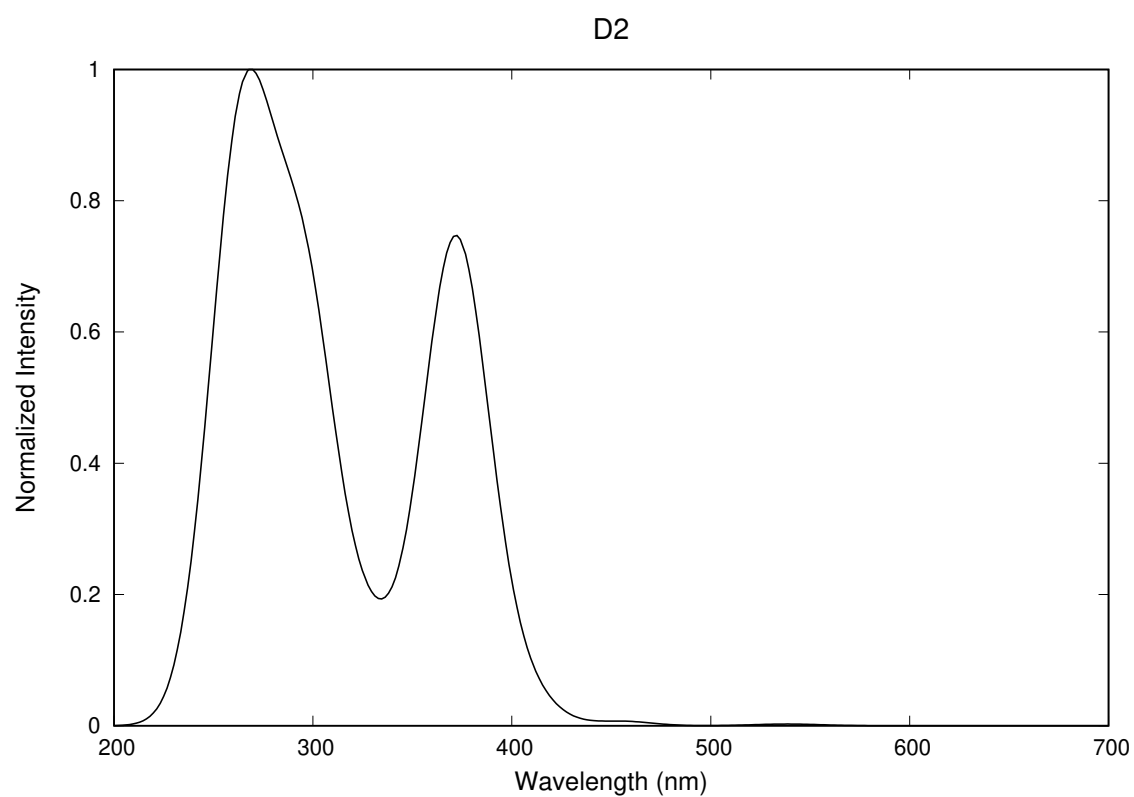

Figure S24: Calculated normalized absorption UV-vis spectra of iron dyes **D1** and **D2**.

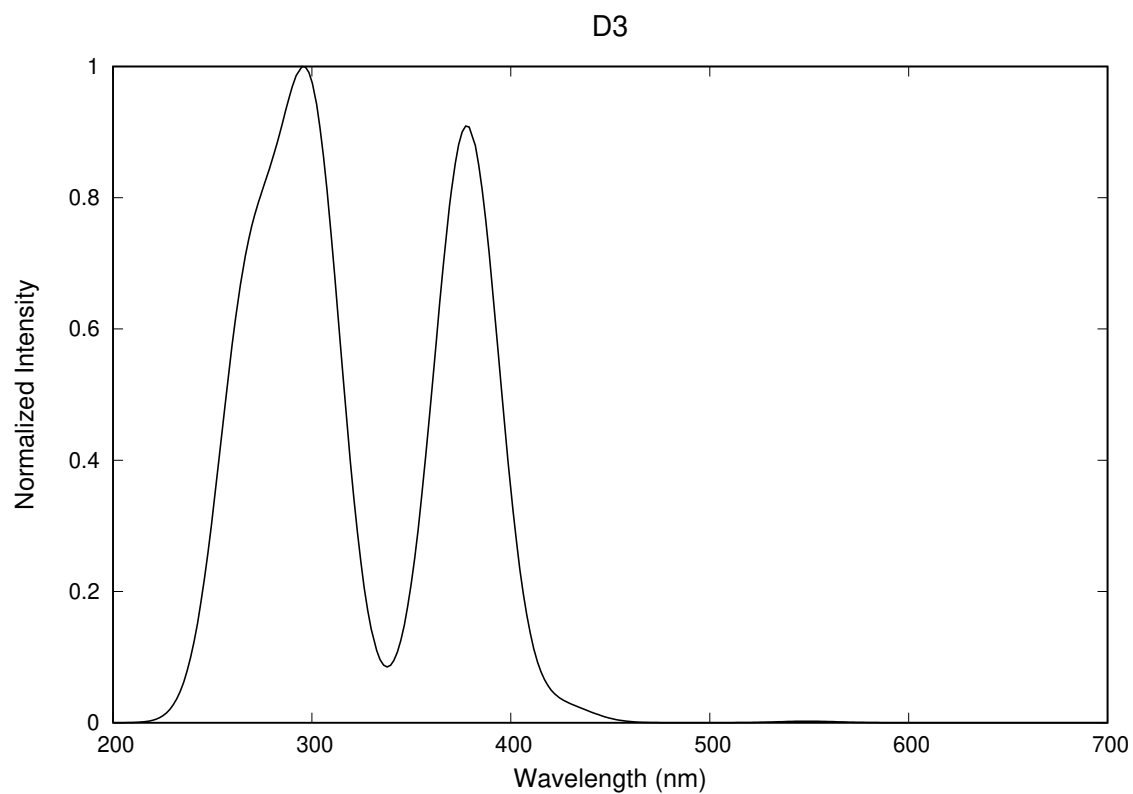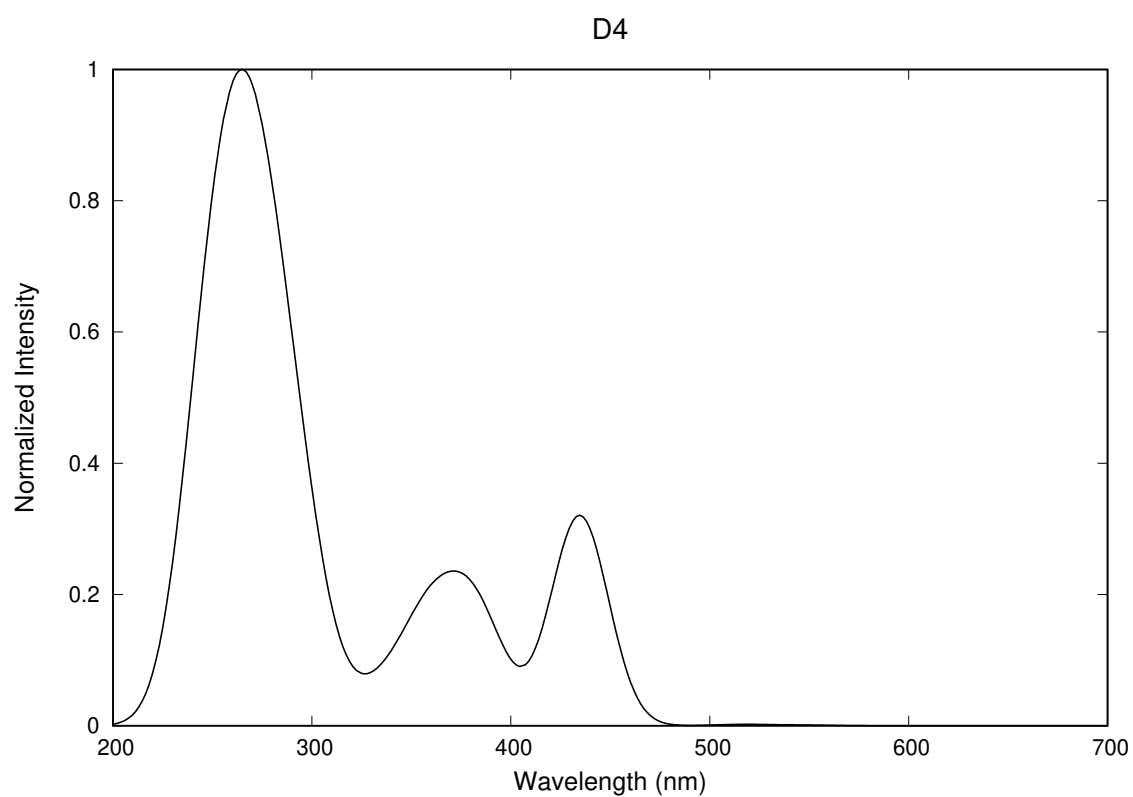

Figure S25: Calculated normalized absorption UV-vis spectra of iron dyes **D3** and **D4**.

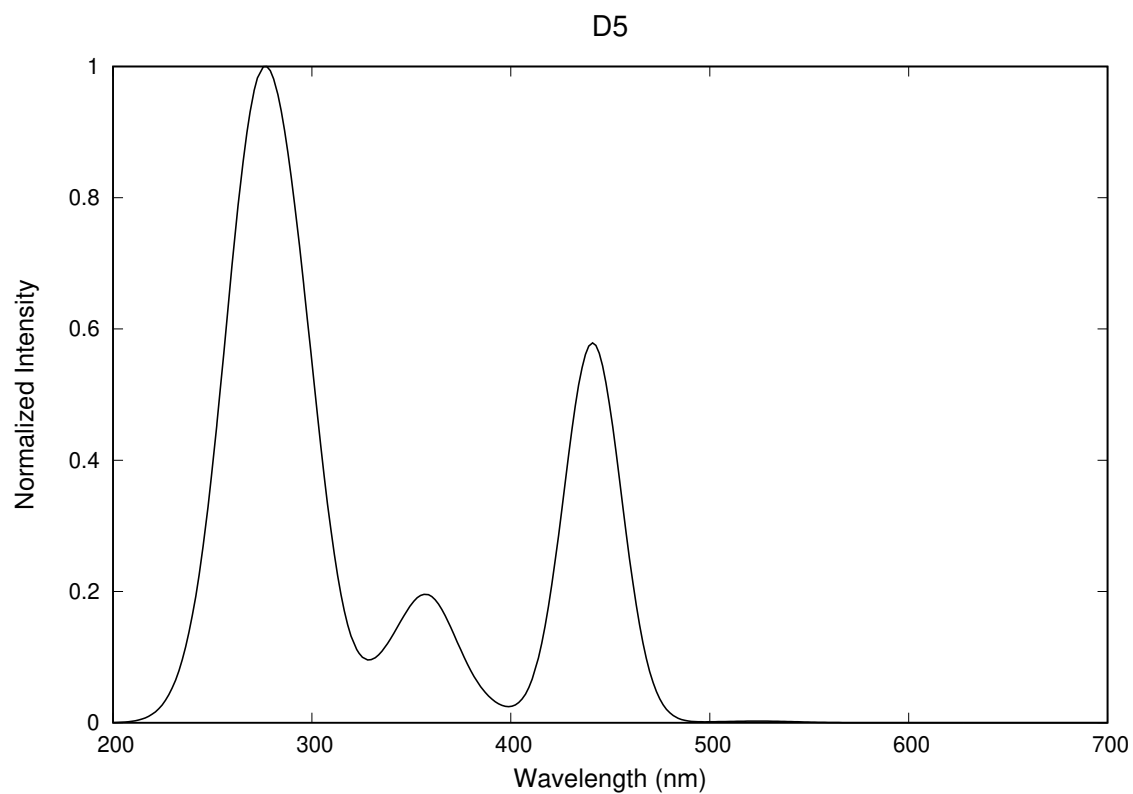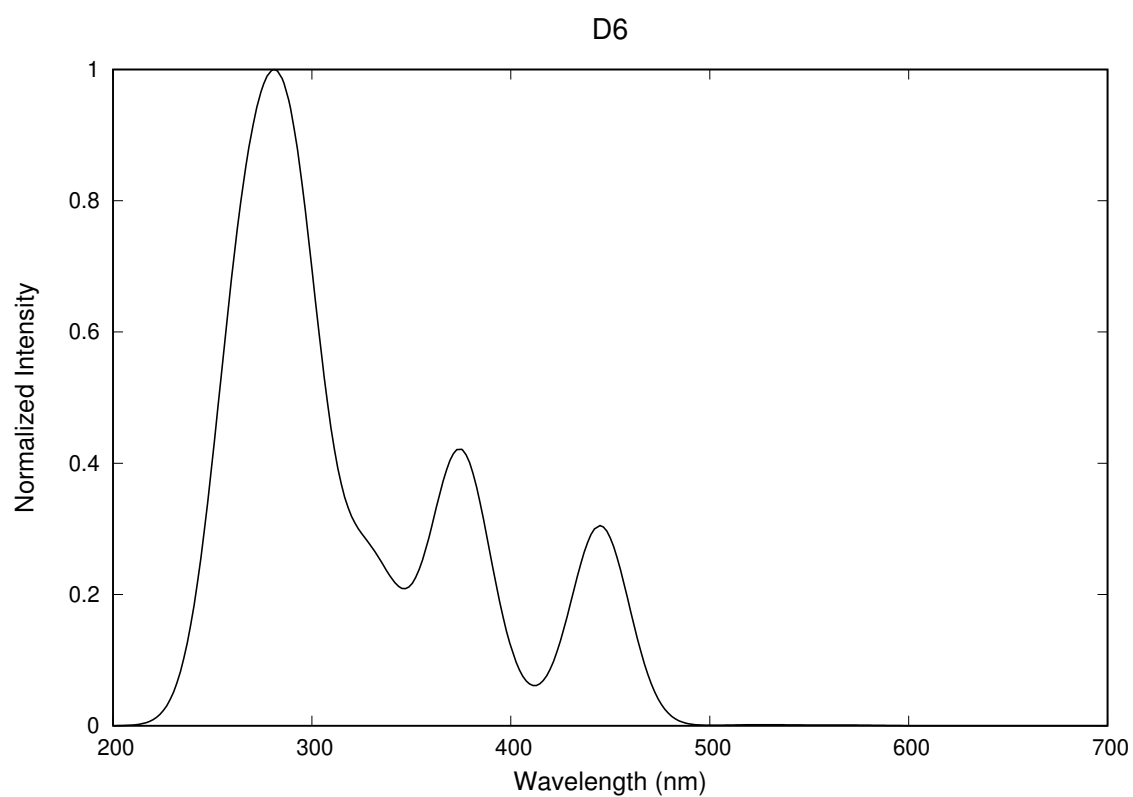

Figure S26: Calculated normalized absorption UV-vis spectra of iron dyes **D5** and **D6**.

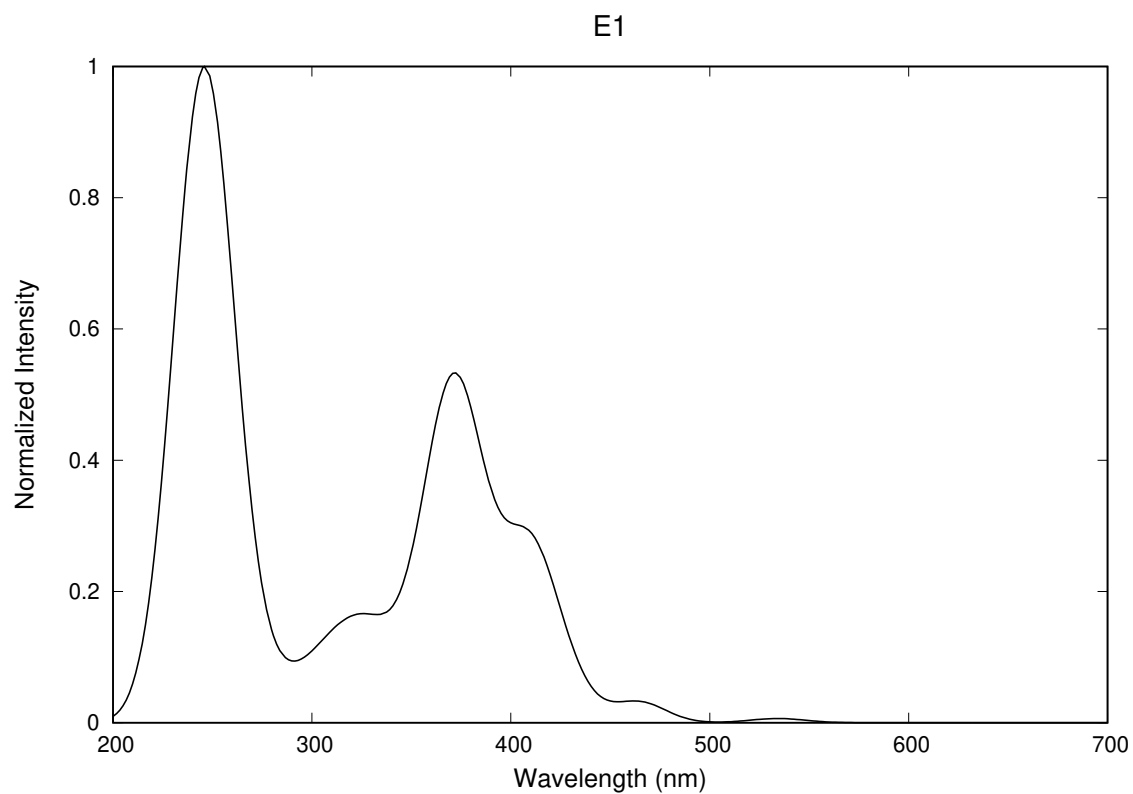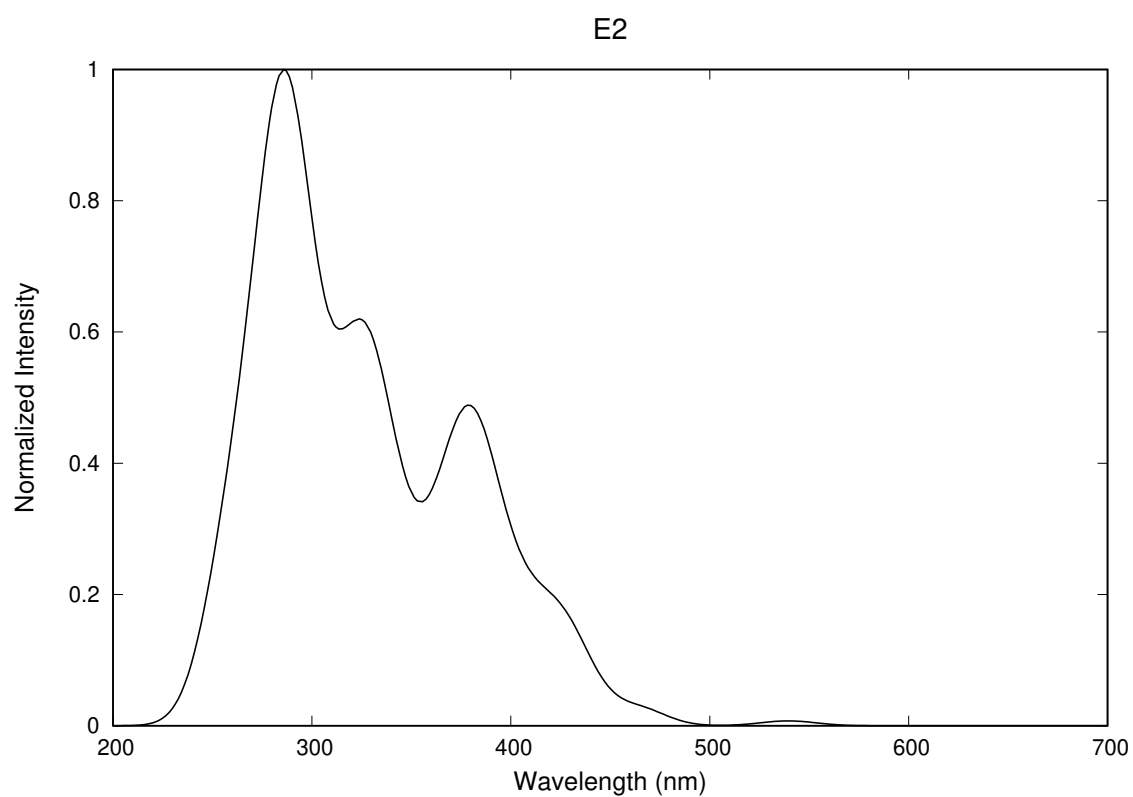

Figure S27: Calculated normalized absorption UV-vis spectra of iron dyes **E1** and **E2**.



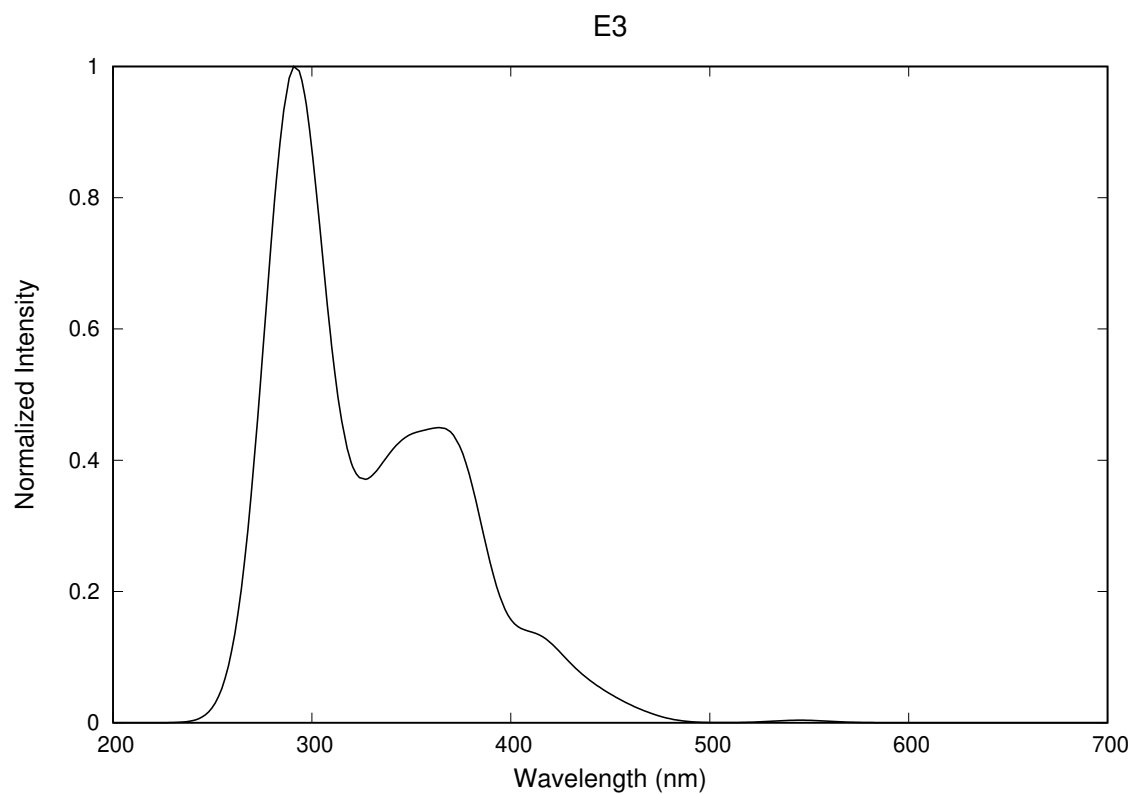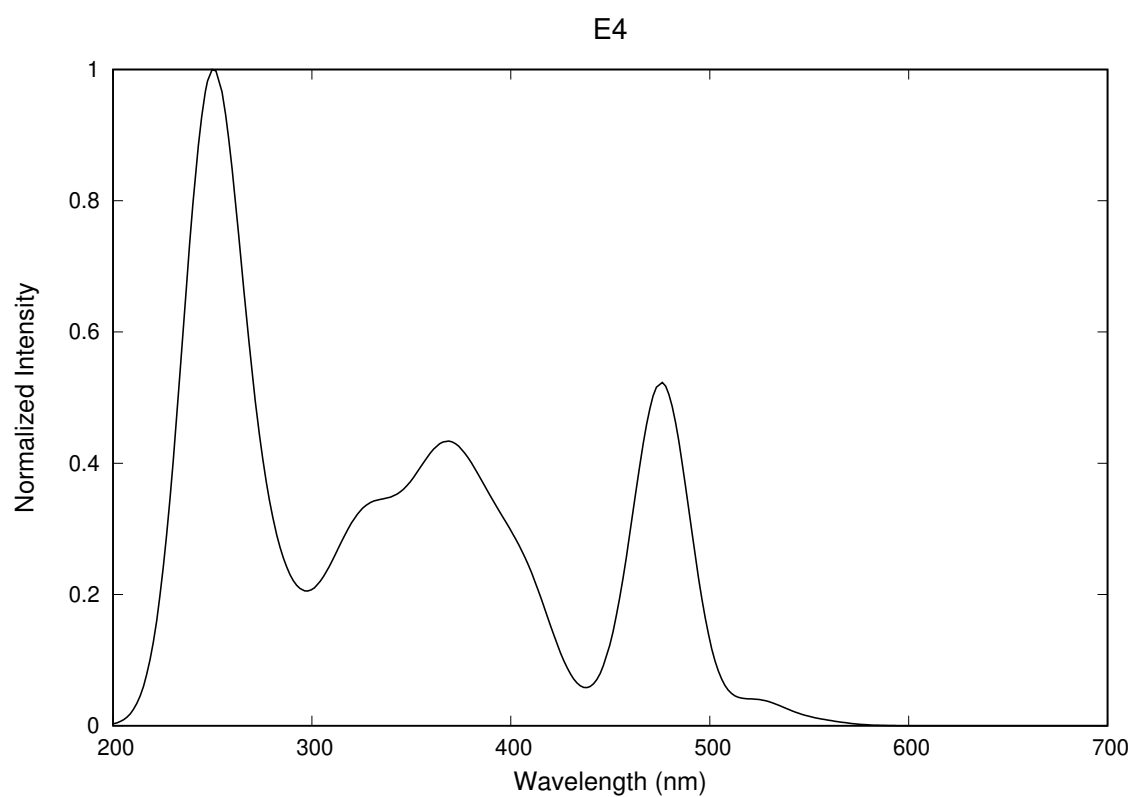

Figure S28: Calculated normalized absorption UV-vis spectra of iron dyes **E3** and **E4**.

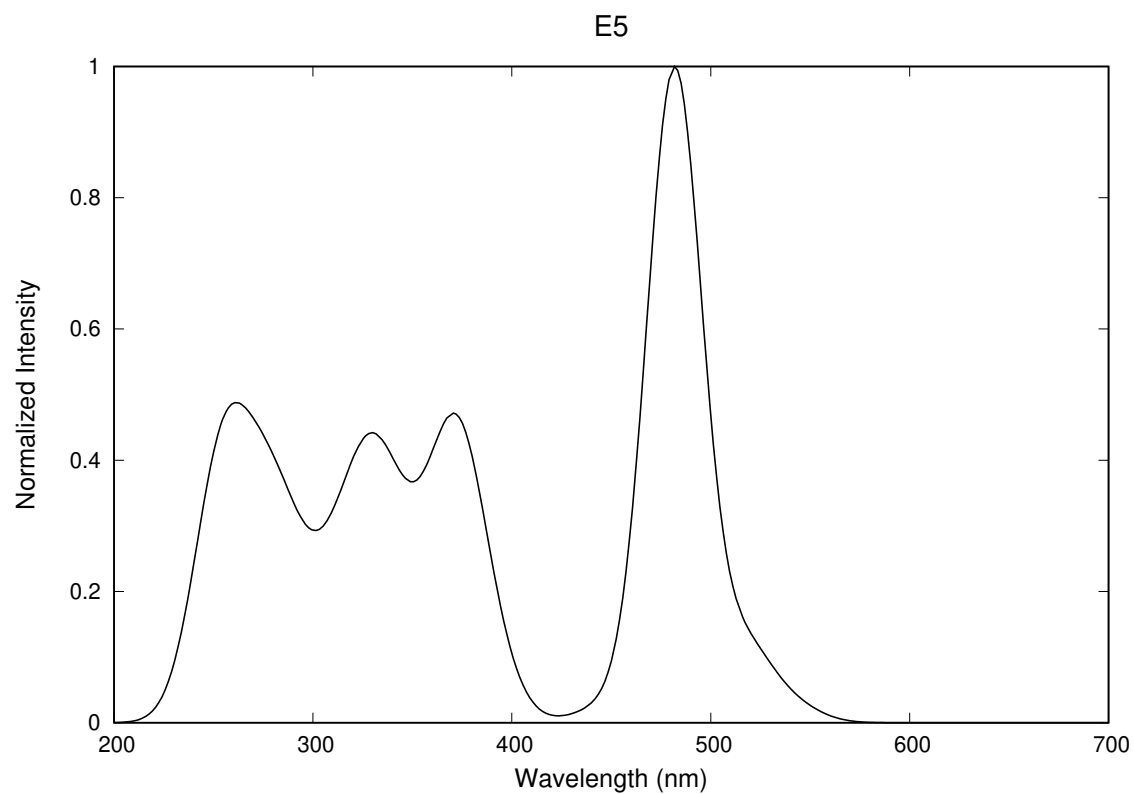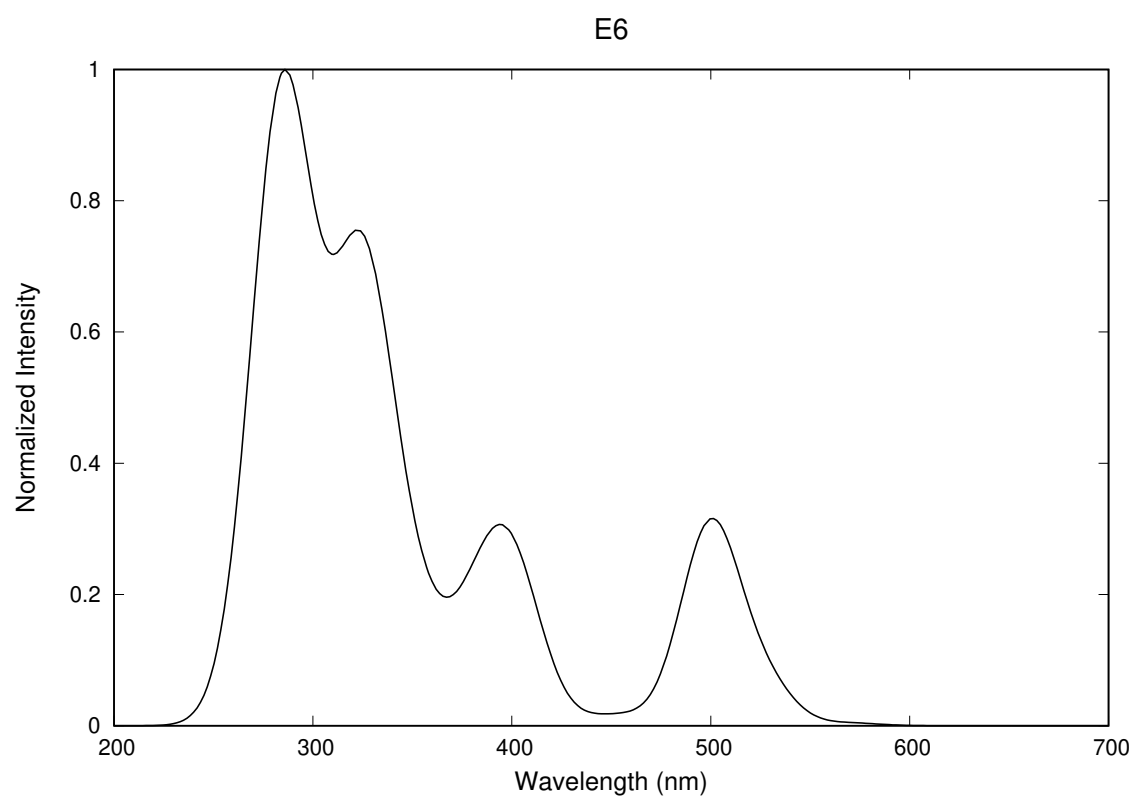

Figure S29: Calculated normalized absorption UV-vis spectra of iron dyes **E5** and **E6**.

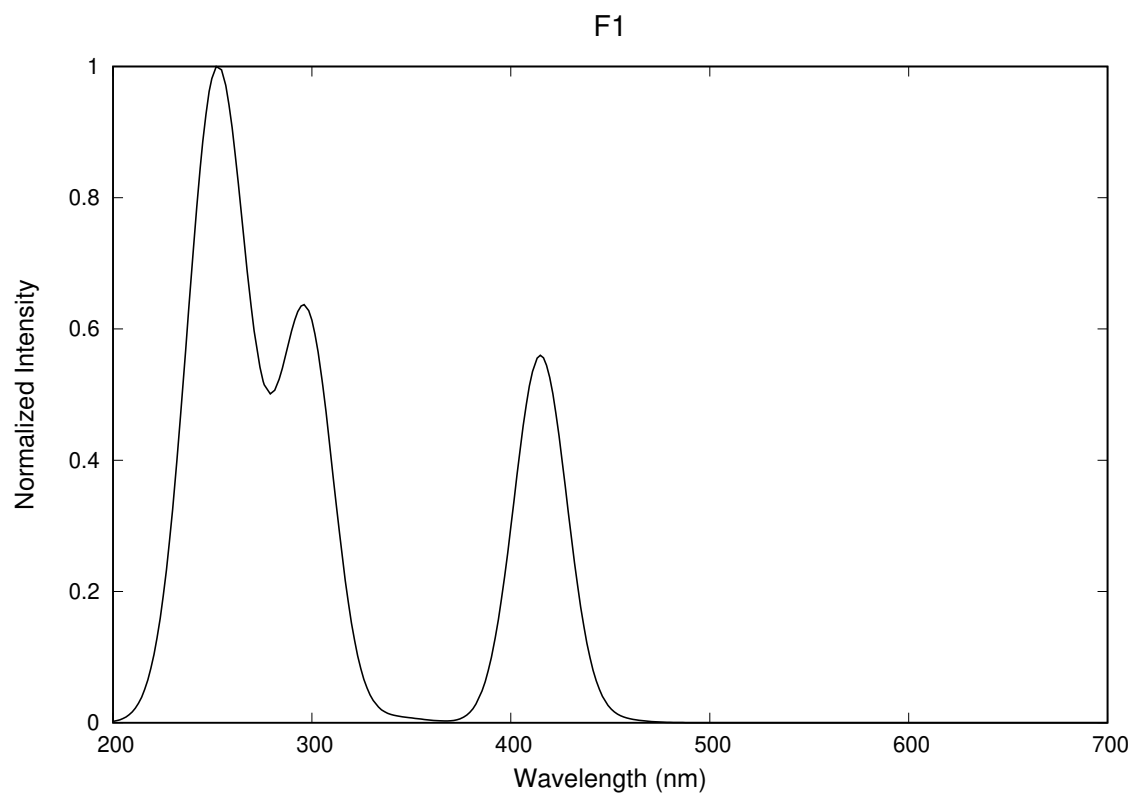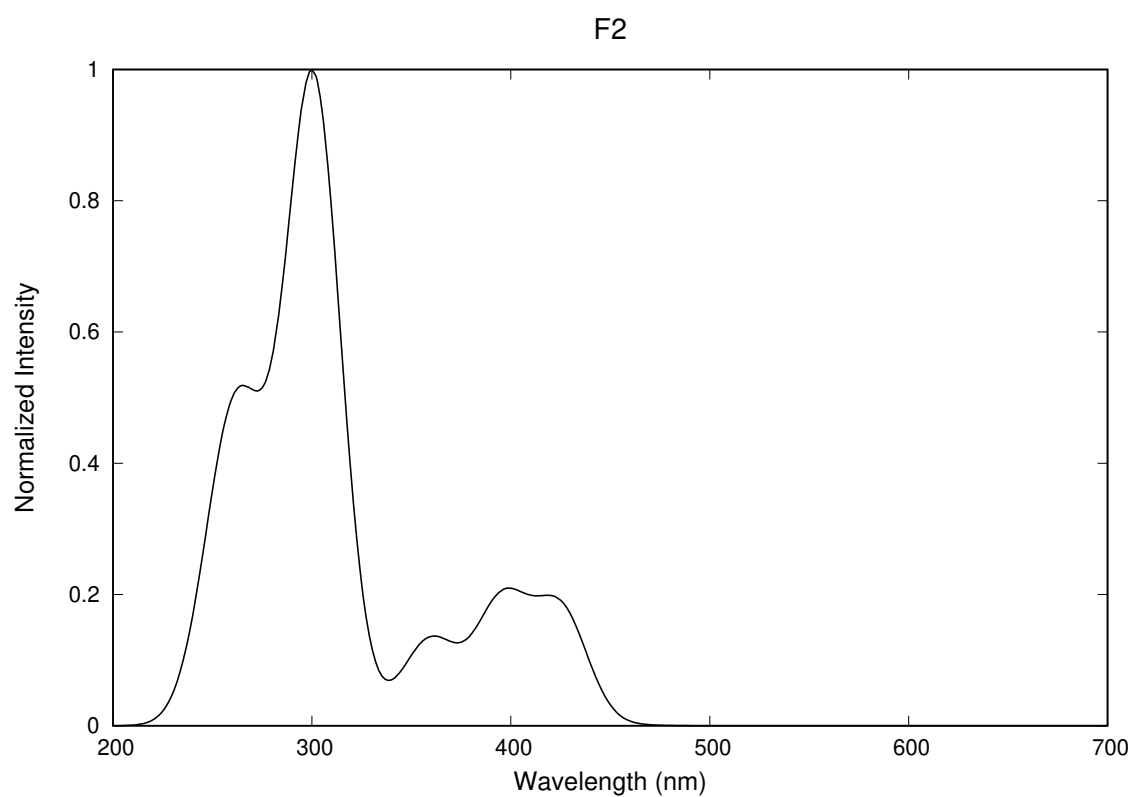

Figure S30: Calculated normalized absorption UV-vis spectra of iron dyes **F1** and **F2**.

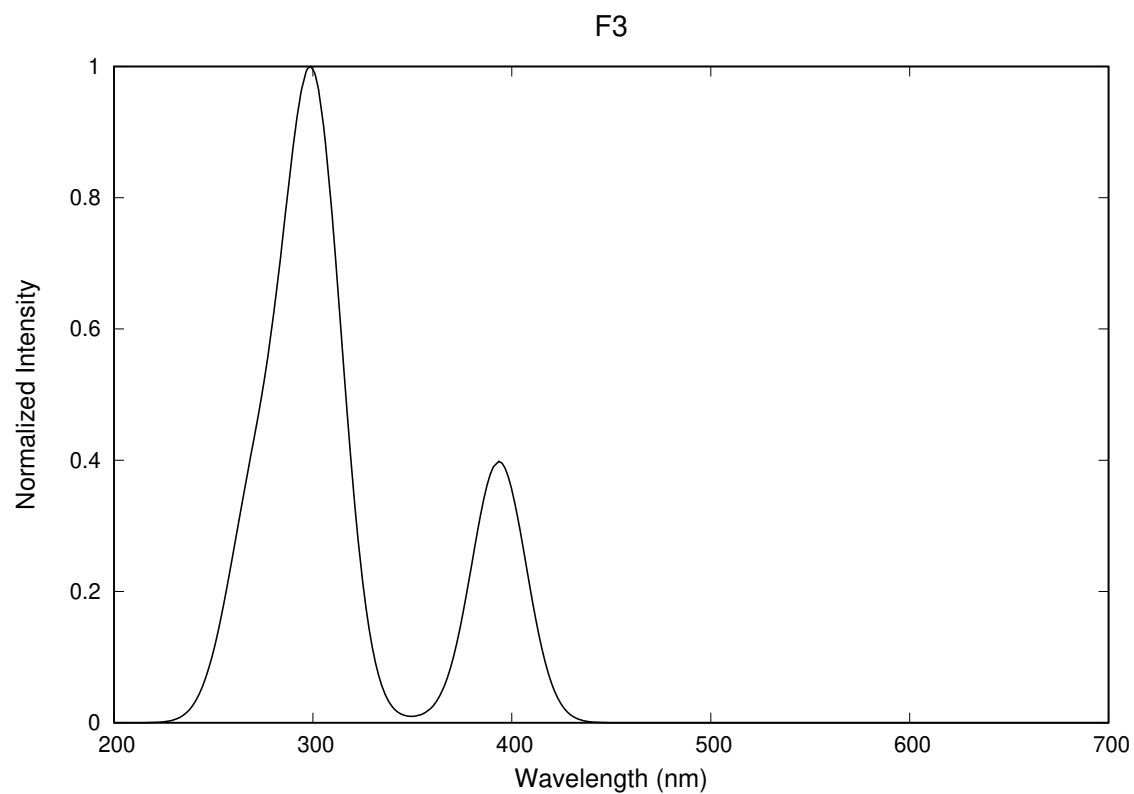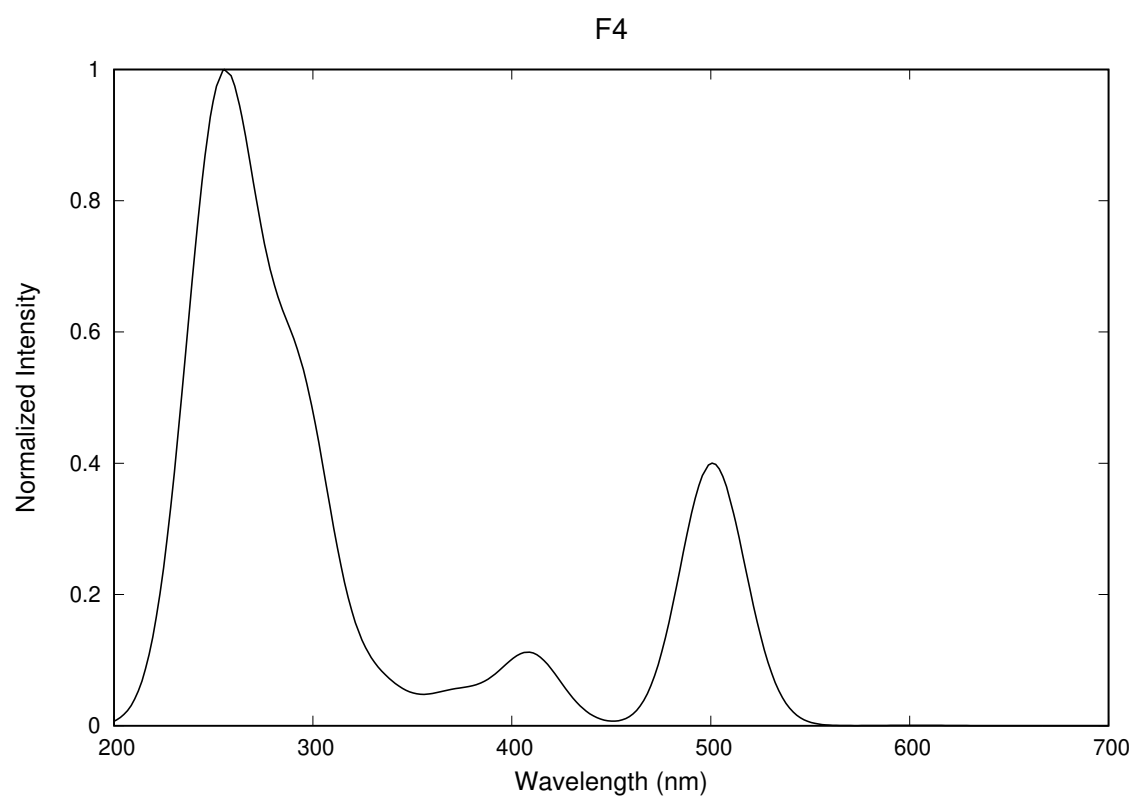

Figure S31: Calculated normalized absorption UV-vis spectra of iron dyes **F3** and **F4**.

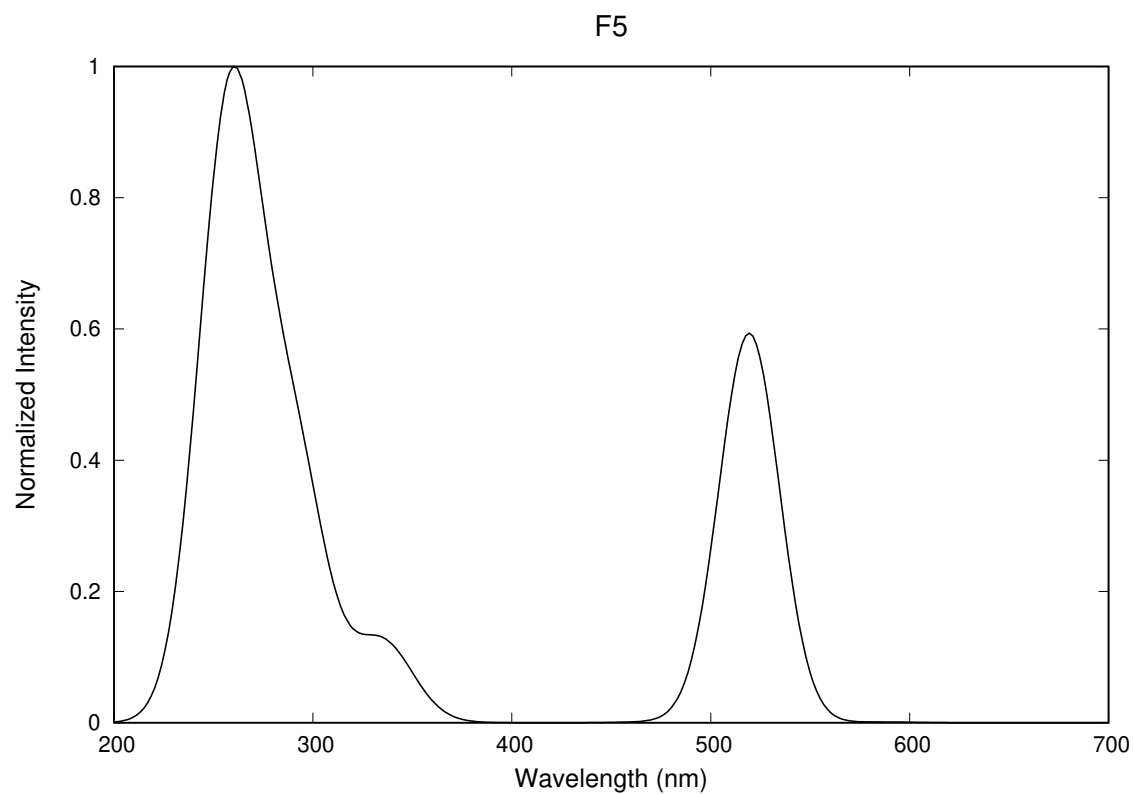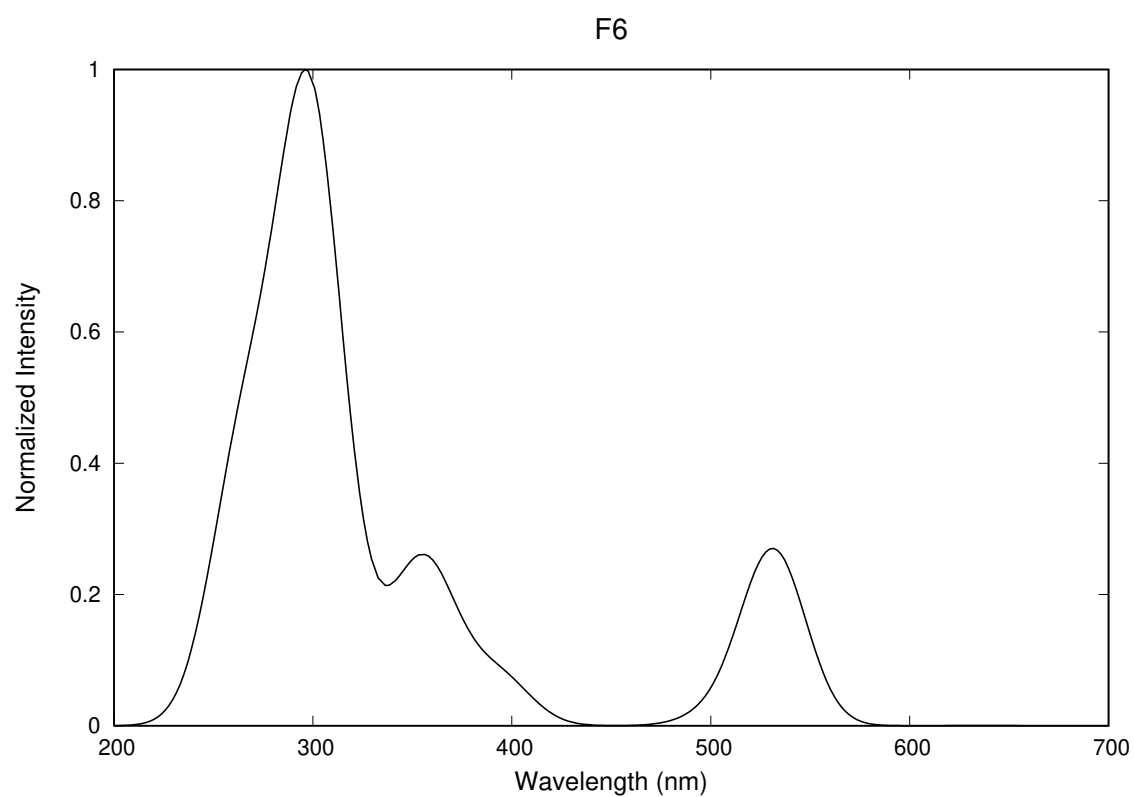

Figure S32: Calculated normalized absorption UV-vis spectra of iron dyes **F5** and **F6**.

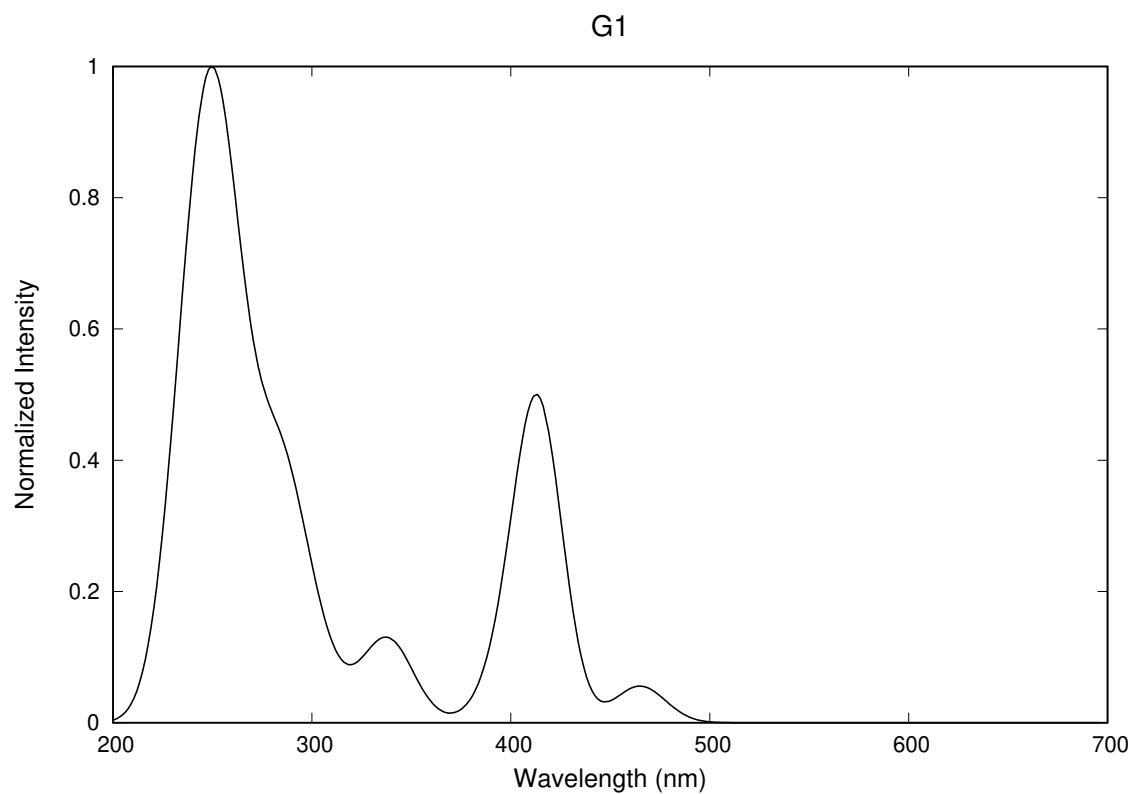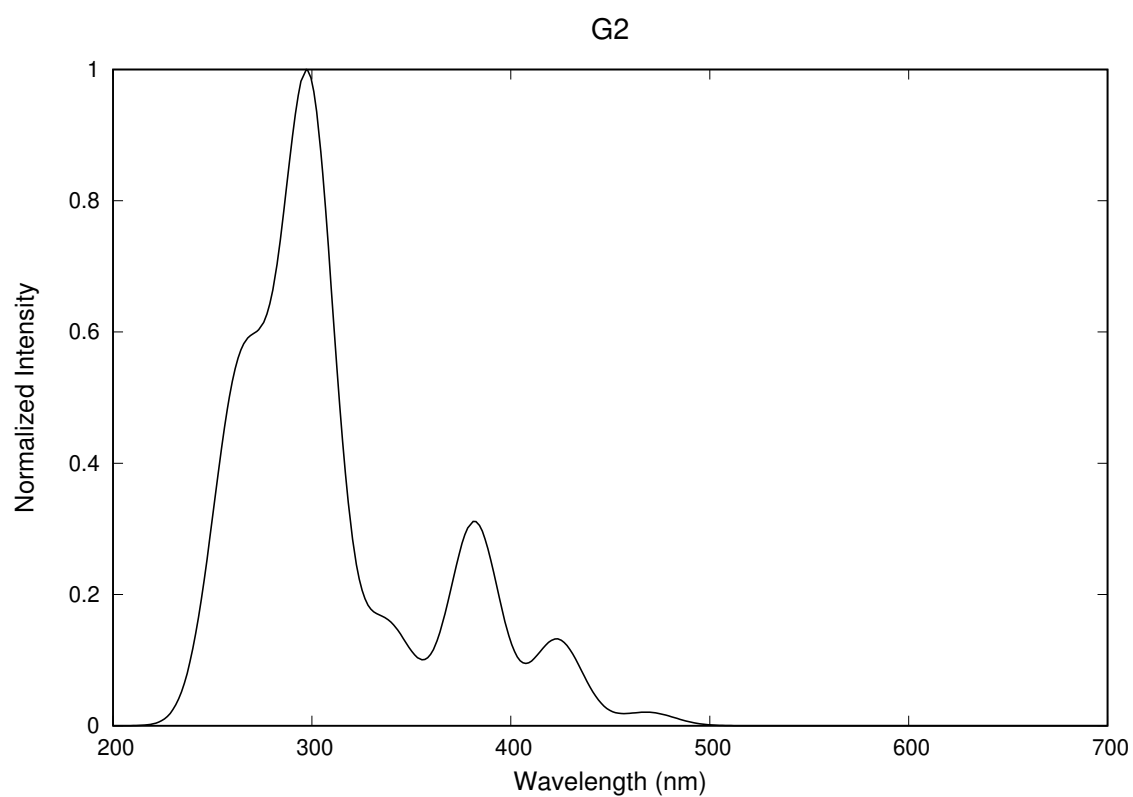

Figure S33: Calculated normalized absorption UV-vis spectra of iron dyes **G1** and **G2**.

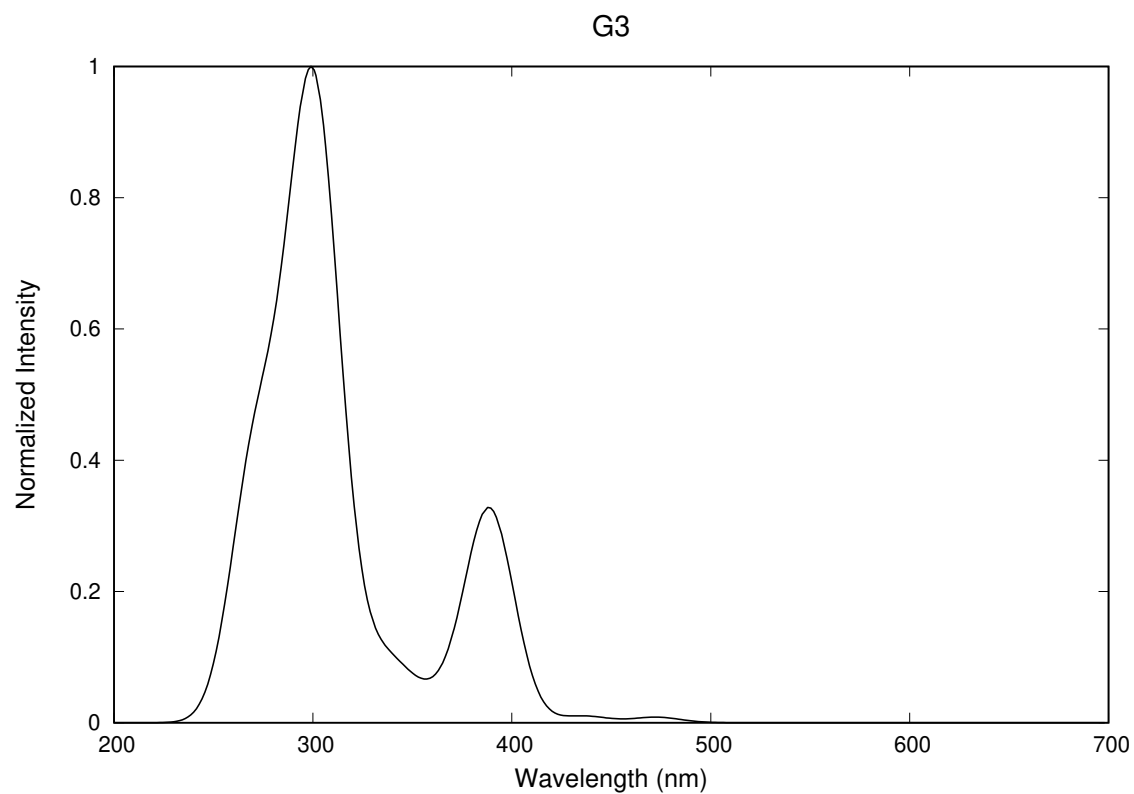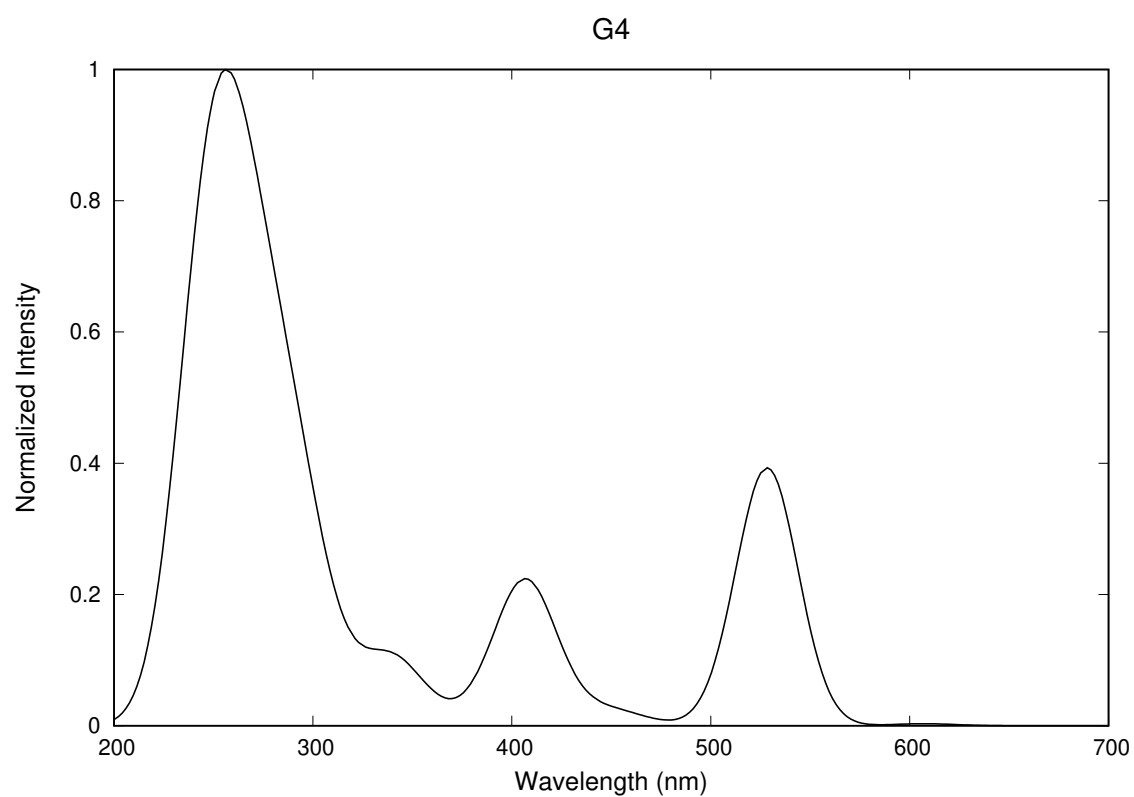

Figure S34: Calculated normalized absorption UV-vis spectra of iron dyes **G3** and **G4**.

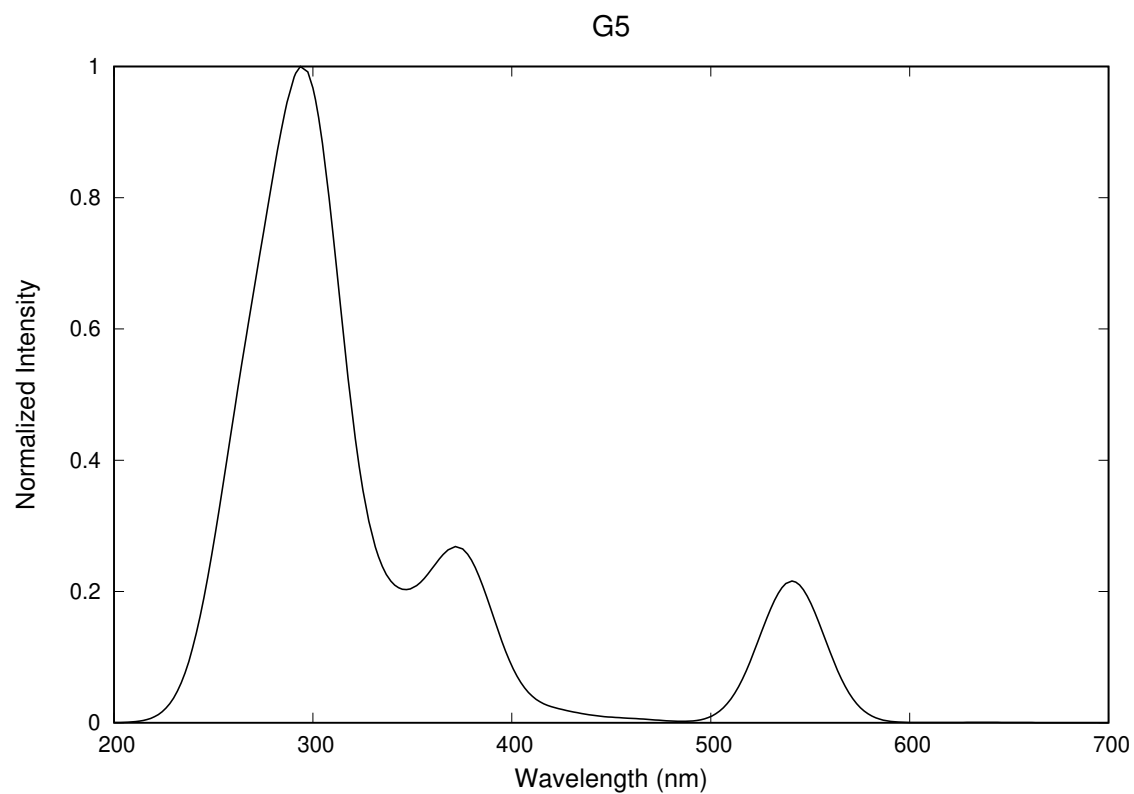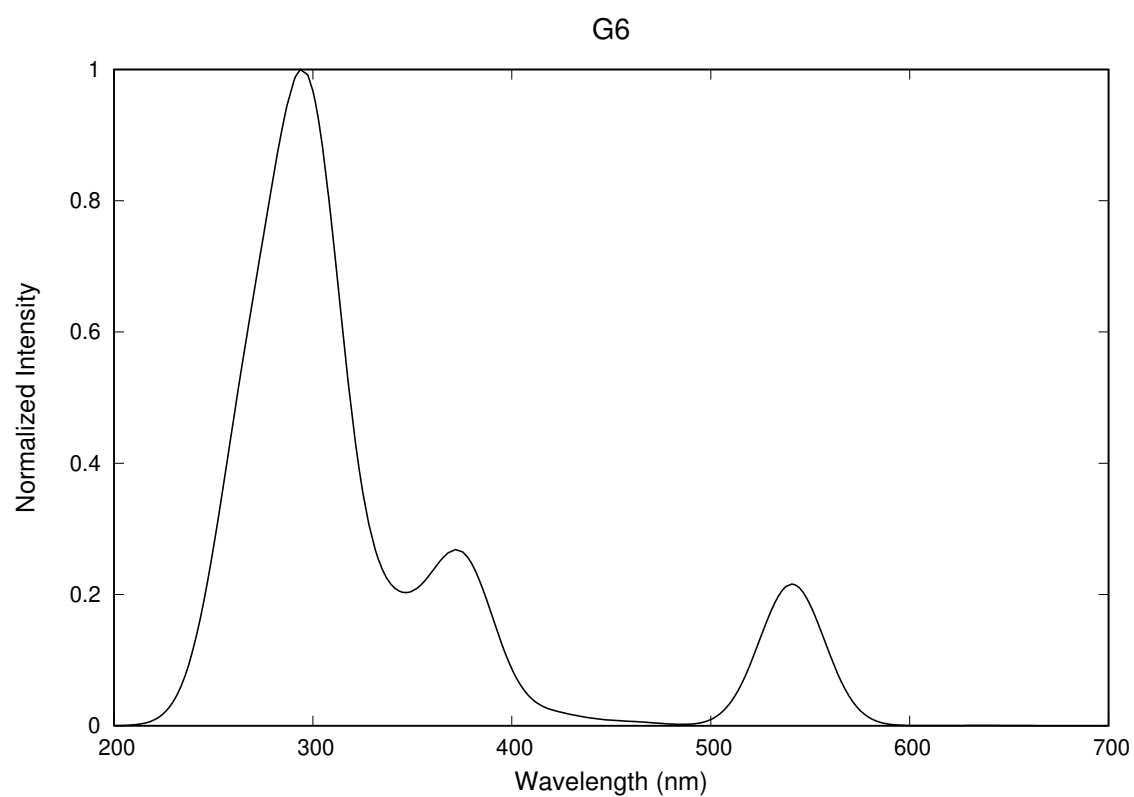

Figure S35: Calculated normalized absorption UV-vis spectra of iron dyes **G5** and **G6**.
